1 **Plasticity of the primary metabolome in 241 cold grown**  
2 ***Arabidopsis thaliana* accessions and its relation to natural**  
3 **habitat temperature**

4 Jakob Weizmann<sup>1,2</sup>, Pieter Clauw<sup>3</sup>, Joanna Jagoda<sup>3</sup>, Ilka Reichardt-Gomez<sup>3</sup>, Stefanie  
5 Koemeda<sup>4</sup>, Jakub Jez<sup>4</sup>, Magnus Nordborg<sup>3</sup>, Dirk Walther<sup>5</sup>, Thomas Nägele<sup>6\*</sup> and Wolfram  
6 Weckwerth<sup>1,2\*</sup>

7 <sup>1</sup>Molecular Systems Biology (MOSYS), Department of Functional and Evolutionary Ecology,  
8 Faculty of Life Sciences, University of Vienna, Vienna, Austria

9 <sup>2</sup>Vienna Metabolomics Center (VIME), University of Vienna, Vienna, Austria

10 <sup>3</sup>Gregor Mendel Institute (GMI), Austrian Academy of Sciences, Vienna, Austria

11 <sup>4</sup>Plant Sciences Facility, Vienna BioCenter Core Facilities GmbH (VBCF), Vienna, Austria

12 <sup>5</sup>Max-Planck-Institute of Molecular Plant Physiology, Potsdam, Germany

13 <sup>6</sup>Plant Evolutionary Cell Biology, LMU Munich, Munich, Germany

14

15 \*Corresponding authors:

16 Thomas Nägele: Ludwig-Maximilians-Universität München, Department Biology I, Plant  
17 Evolutionary Cell Biology, Großhaderner Str. 2-4, 82152 Planegg-Martinsried, Germany,  
18 thomas.naegele@lmu.de

19 and

20 Wolfram Weckwerth: University of Vienna, Department of Functional and Evolutionary  
21 Ecology, Vienna, Austria, Althanstr. 14, 1090 Vienna, Austria,  
22 wolfram.weckwerth@univie.ac.at

23

ORCID ID:

JW: 0000-0001-6656-3808

PC: 0000-0002-9677-8727

MN: 0000-0001-7178-9748

DW: 0000-0002-5755-9265

WW: 0000-0002-9719-6358

TN: 0000-0002-5896-238X

24

25 **Abstract**

26 In the present study, 241 natural accessions of *Arabidopsis thaliana* were grown under two  
27 different temperature regimes, 16 °C and 6 °C, and growth parameters were recorded  
28 together with metabolite profiles to investigate the natural variation in metabolic responses  
29 and growth rates. Primary metabolism and growth rates of accessions significantly differed  
30 between accessions and both growth conditions. Relative growth rates showed high  
31 correlations to specific metabolite pools. Metabolic distances based on whole metabolite  
32 profiles were built from principal component centroids between both growth setups.  
33 Genomic prediction using ridge-regression best linear unbiased prediction (rrBLUP) revealed  
34 a significant prediction accuracy of metabolite profiles in both conditions and metabolic  
35 distances, which suggests a tight relationship between genome and primary metabolome.  
36 GWAS analysis revealed significantly associated SNPs for a number of metabolites, especially  
37 for fumarate metabolism at low temperature. A highly significant correlation was observed  
38 between metabolic distances and maximum temperature in the original growth habitat  
39 between January and March. Inverse data-driven modelling revealed that metabolic pathway  
40 regulation and metabolic reaction elasticities distinguish accessions originating from warm  
41 and cold growth habitats.

42

## 43 Introduction

44 Acclimation and adaptation of metabolism to a changing environment are key processes for  
45 plant survival and reproductive success. The multitude of different abiotic and biotic stressors  
46 requires plant metabolism to be highly flexible, as the mode of reprogramming of metabolism  
47 depends on the type and strength of stress that plants are exposed to <sup>1,2</sup>. The metabolic  
48 response to changing environmental factors differs significantly between plant species <sup>3</sup>, as  
49 well as among ecotypes or cultivars of the same species <sup>4-6</sup>. Temperature affects plant  
50 development and has been shown to be an important determinant for the geographical  
51 distribution range of many temperate plant species, e.g., *A. thaliana* <sup>7</sup>. Considering that only  
52 5 % of the land mass worldwide is free of freezing events <sup>8</sup> and low temperature damage leads  
53 to significant losses in agricultural yield <sup>9,10</sup>, the investigation of plant cold response bears a  
54 large potential in establishing a sustainable supply of food for a growing world population <sup>11</sup>.

55 Exposure to low temperature immediately affects plant metabolism by reducing enzymatic  
56 reaction rates, which has a significant effect on biosynthesis, degradation and transport  
57 processes (see, e.g., <sup>12</sup>). Within a process termed cold acclimation, metabolism is adjusted to  
58 low temperature, which, in many temperate plant species, results in increased freezing  
59 tolerance <sup>13</sup>. Cold acclimation is a multigenic process that affects hundreds of genes,  
60 numerous signalling cascades and metabolic pathways to stabilize photosynthetic capacity  
61 and plant performance <sup>14</sup>. Cold exposure typically results in a rapid increase of the C-repeat  
62 binding factor (CBF) transcription factors (TFs) that regulate more than 100 genes, the so-  
63 called CBF regulon, that plays a dominant role in cold acclimation <sup>15</sup>. Comparing Italian and  
64 Swedish *A. thaliana* accessions revealed lower induction of the CBF regulon in the Italian  
65 accessions, which contributed to lower freezing tolerance compared to the Swedish  
66 accessions <sup>16</sup>. Although CBF TFs rapidly increase after cold exposure, comparison of time-  
67 resolved cold response of *A. thaliana* revealed a faster metabolic response when compared  
68 to transcriptional response <sup>2</sup>. This finding indicates a complex mode of regulation, which, in  
69 addition to transcription, also includes translational, post-translational and metabolic  
70 regulation <sup>17</sup>

71 *A. thaliana* inhabits a large latitudinal range <sup>18</sup>, and is therefore confronted with a wide range  
72 of climatic conditions. This wide distribution and the predominantly selfing reproduction type  
73 have led to the development of a large number of genetically distinct (homozygous) inbred

74 lines called accessions, which are well adapted to the prevailing microclimate<sup>19-21</sup>. The  
75 accessions feature large variances in cold and freezing resistance, acquired after cold  
76 acclimation and naïve, without cold acclimation. These adaptations were shown to be  
77 connected to the mean minimum temperature of origin, indicating selective pressure by the  
78 ability to adapt to low temperatures<sup>22,23</sup>. The variance in freezing tolerance along  
79 geographical clines of origin, were correlated to several differences in the accumulation of  
80 sugars and the expression of a number of CBF-regulated genes, after an acclimation phase at  
81 low, non-freezing temperatures<sup>24</sup>. A further example of the adaptation of *A. thaliana* to local  
82 climates was recently given, by showing a strong connection of climate of origin and the life-  
83 history strategy, i.e. the prevalence of winter or summer annuality<sup>25</sup>.

84 It has been reported earlier that habitat temperature of natural *A. thaliana* accessions  
85 determines the response of physiological parameters like photosynthesis and transpiration  
86 to growth temperature<sup>26</sup>. Although it is known that photosynthesis needs to be tightly linked  
87 to carbohydrates and primary metabolism in order to sustain growth and development, it  
88 remains unclear how natural variation of primary metabolism relates to growth rates. In this  
89 study, natural variation of growth rates of *A. thaliana* was monitored together with dynamics  
90 of primary metabolites under moderate (16 °C) and low (6 °C) temperature. In total, 241  
91 natural accessions were analysed growing for three weeks under each condition.

92

## 93 **Results**

### 94 **Natural variation allows for genomic prediction of metabolome plasticity and metabolic** 95 **distance between 6 °C and 16 °C growth conditions**

96 Absolute metabolite amount was quantified from leaf material of *A. thaliana* accessions,  
97 comprising 37 primary metabolites of which 18 changed at least two-fold and significantly in  
98 their amount (ANOVA,  $p < 0.05$ ) between the two different growth temperature regimes, i.e.,  
99 16 °C and 6 °C (Figure 1). Metabolite profiles differed in an accession specific manner. Most  
100 of significantly changed metabolites (15) accumulated in the plants grown at 6 °C, and only  
101 spermidine, ornithine, and glycine accumulated to higher amounts in plants grown at 16 °C.  
102 Strongest accumulation in the cold growth condition with fold changes  $> 45$  was observed for  
103 raffinose and galactinol. Principal component analysis (PCA) separated the two growth

104 conditions, and the two first principal components (PCs) together covered 48.52 % of total  
105 variance (Figure 2). Highest factor loadings separating 6 °C from 16 °C were found for  
106 carbohydrates and alcohols, e.g., raffinose, galactinol, sucrose, trehalose, and myo – inositol  
107 (Supplemental Table 2). Genomic prediction was performed applying the Best Linear  
108 Unbiased Predication (BLUP) methodology<sup>27</sup> and a strong predictability of metabolite profiles  
109 could be shown (Figure 3a). 25,826 unique SNPs were used to predict the 37 metabolites in  
110 both growth conditions, as well as a cross condition approach in which the metabolite profiles  
111 of the 16 °C condition were utilized to predict the metabolite profiles of the 6 °C condition  
112 and *vice versa*. For within condition prediction, Kernel density functions of predictability,  
113 scored by Pearson correlation of observed versus predicted values, peaked at a correlation  
114 coefficient of ~0.5 for the 16 °C condition and ~0.4 for the 6 °C condition. Cross-condition  
115 prediction accuracy was slightly lower (Figure 3a). Metabolic distances were calculated for all  
116 accessions to investigate natural variation of metabolic responses to the cold growth  
117 conditions. Metabolic distance values represented Euclidian distances in the PCA space  
118 covering the divergence of metabolism between 6 °C and 16 °C. Distances comprised  
119 information about all quantified metabolites and, therefore, allowed insight into the  
120 amplitude of changes on a large part of plant primary metabolism between different  
121 conditions. rrBLUP was used for prediction of metabolic distance. As shown in figure 3a  
122 metabolic distance was predicted with a slightly better correlation coefficient than the  
123 average of individual metabolites in the metabolite profile, indicating that the amplitude of  
124 change to environmental perturbation is closely related to genome variation. To investigate  
125 the genetic background of differences metabolism, GWAS was conducted using the  
126 metabolite levels in both conditions (Supplemental Table 5). The strongest , significant  
127 correlation was found for SNPs in the promotor region of the FUM2 gene (AT5g50950) in the  
128 6 °C condition, which highlights the influence of genetic variation in the regulation of  
129 fumarate metabolism under the applied growth condition (Figure 3 b and c).

130

### 131 **Q1 temperature at the natural origin of *Arabidopsis* accessions is linked to metabolic** 132 **distances between cold and warm growth conditions**

133 Accessions showed large diversity in metabolic adjustments to the cold growth conditions,  
134 reflected by a large range of metabolic distances (Figure 4). For southern accessions, a

135 relatively small metabolic distance was observed, while northern accessions showed  
136 relatively large metabolic distances. Each of the accessions was assigned to a genetic  
137 admixture group <sup>28</sup> and a one-way ANOVA revealed significant differences in metabolic  
138 distance between the groups (one-way ANOVA p-value: 9.54E-13). A trend along a gradient  
139 of latitude of origin of the admixture groups was revealed (Figure 4b & Figure S 1) indicating  
140 a directed influence of genetic and geographic origin on the metabolic response to cold  
141 growth conditions. As the metabolic distance roughly correlated to a north – south gradient,  
142 a dataset containing climatic variables was used to find correlations between the climate of  
143 origin for the analysed accessions and their metabolic response. To investigate the  
144 relationship of metabolic response to cold and climate of origin, Spearman correlation  
145 coefficients between the metabolic distance and environmental variables, comprising  
146 temperature, solar radiation, water vapour pressure, precipitation and wind speed were  
147 calculated. Highest correlation coefficients for metabolic distance were observed for  
148 temperature variables between January and March, i.e., the first quarter of the year (Q1).  
149 Correlation coefficients between metabolic distance and values of climate parameters for  
150 each month revealed that temperature was the most influential parameter throughout the  
151 year, but the correlation strength decreased in the warmer part of the year, i.e., between  
152 May and August (Figure 5, Table S 1). Precipitation had a negligible correlation with metabolic  
153 distance, indicating a low impact of this factor on regulation of metabolic reactions of plants  
154 to the applied cold growth conditions. To investigate if a combination of climate variables  
155 could yield a better explanatory model for metabolic distance, backwards stepwise linear  
156 regression, selecting for the lowest RMSE (root mean square error) was employed. Using a  
157 dataset containing summary variables of climate parameters for each quarter of the year, the  
158 model with the lowest RMSE contained only the variable describing the average maximum  
159 temperature of Q1. Additional statistical analyses using different methods for variable  
160 selection, i.e., ridge regression, lasso regression and partial least square discriminant analysis  
161 (PLS-DA) confirmed that Q1 temperature was consistently the strongest predictor for  
162 metabolic distance. Additionally, stepwise backwards linear regression on a dataset  
163 containing climate variables for each month, as well as a dataset of bioclimatic variables,  
164 yielded models containing temperatures in Q1 as the most influential independent variable.  
165 Evaluation of a linear model of metabolic distance and maximum temperature in January to  
166 March showed a significantly negative correlation ( $R^2 = 0.2687$ ,  $p = <2.2E-16$ ; Figure 6). This

167 correlation was stronger than the correlation of metabolic distance with geographic latitude  
168 ( $R^2 = 0.1861$ ,  $p = 1.6E-12$ ). The correlation of temperature at the geographical origin and the  
169 observed metabolic distance stayed significant after including a correction for population  
170 structure via a partial Mantel test using a genetic relatedness matrix as control variable (Table  
171 S 1).

172

### 173 **Accessions from cold and warm climate have specific metabolite profiles under cold growth** 174 **conditions**

175 Climate of origin, especially maximum Q1 temperature, was significantly correlated to  
176 metabolic distance. Therefore, two subsets of the dataset, representing accessions  
177 originating from colder or warmer climate, defined by the upper and lower quartiles (25 %  
178 and 75 %; 4.77 °C and 7.86 °C respectively) of maximum Q1 temperature (Figure S 4), were  
179 selected to investigate the differences in metabolic response to the cold growth conditions.  
180 In accessions originating from colder climate (< 4.77 °C maximum Q1 temperature), most  
181 investigated metabolites were present in higher concentration at 6 °C compared to accessions  
182 originating from warmer climate (> 7.86 °C maximum Q1 temperature). Of these metabolites,  
183 10 were present in significantly higher concentration (one-Way ANOVA p-Value <0.05, fold  
184 change >2; Figure 7 A) and 20 were present in slightly, but significantly higher concentration  
185 (one-Way ANOVA p-Value <0.05, fold change >1 & <2). Only glutamic acid and glutamine were  
186 found at significantly higher concentrations in accessions originating from warmer climate in  
187 the 6 °C condition (one-Way ANOVA p-Value <0.05, fold change <1).

188 Accessions originating from colder climates contained higher concentrations of sugars, and  
189 particularly of raffinose, than accessions from warm climates at 6 °C. However, raffinose was  
190 also found in higher concentration in the 16 °C growth condition in those accessions.  
191 Therefore, the proportional increase between the 6 °C and the 16 °C condition, representing  
192 the raffinose accumulation caused by the low temperature, was not significantly different  
193 between the two groups of colder or warmer origin. Glucose and fructose, on the other hand,  
194 both accumulated to higher absolute amount and in higher proportion in the accession group  
195 originating from colder climate at 6 °C (fold change ~2). In general, the accumulation of  
196 glucose and fructose was negatively correlated with maximum Q1 temperature (glc:  
197 spearman`s  $\rho = -0.45$ , p-value = 1.85E-13; frc: spearman`s  $\rho = -0.35$ , p-value = 2.19E-8).

198 The amount of galactinol, which is a substrate for raffinose biosynthesis, was significantly  
199 higher at 6 °C and the accumulation caused by the 6 °C condition, compared to the 16 °C  
200 condition was stronger in accessions from colder climate. Also, the amount of ornithine was  
201 higher at 6 °C and it accumulated stronger in the plants from cold climates (Figure 7).

202 With decreasing Q1 temperature of origin, both the average in metabolic distance and the  
203 deviation from this average increased, resulting in a higher absolute variance in metabolic  
204 distance in accessions originating from colder regions (Figure 6, Figure S 2). Therefore, some  
205 accessions from colder habitats feature a similarly small metabolic response to 6 °C as  
206 accessions coming from warmer regions, while others show metabolic distances, which are  
207 more than three times as big. The increase of variance reflected in the metabolic distance of  
208 accessions originating from colder climates was based on strong increases in the absolute  
209 variance of levels of galactinol, raffinose, threitol, fructose, glucose, citric acid, threonic acid,  
210 and proline in 6 °C (Figure 6, Figure S 2). The variance of galactinol and raffinose, described  
211 by the Full Width at Half Maximum (FWHM) of kernel density functions, was higher by a factor  
212 of ~4.5 and ~6.5 respectively, in the accessions originating from colder climates.

213 To test to what extent genetic variance was explaining the observed variation in metabolite  
214 levels, broad-sense heritabilities were calculated for each metabolite in both temperatures.  
215 These heritabilities ranged from close to zero to 0.52 and 0.43 in respectively 16 °C and 6 °C.  
216 Four metabolites of those that lead to increased variance in metabolic distance had the  
217 highest heritabilities in 6 °C: galactinol, raffinose, fructose, glucose (Figure S 3). The highest  
218 heritabilities in both temperatures were found for galactinol and raffinose. This shows that  
219 there is a genetic basis for the observed variance in metabolites. With a mixed-effect model  
220 we tested for significance of the genotype specific temperature response (genotype by  
221 environment interaction; GxE) of each metabolite. Eleven metabolites showed a significant  
222 GxE effect (citric acid, fructose, galactinol, glucose, malic acid, myo inositol, oxoglutaric acid,  
223 proline, raffinose, serine, and trehalose;  $fdr < 0.05$ ). Together, this shows that there is a  
224 genetic basis for both the variation of certain metabolites within specific temperatures, as for  
225 the temperature response itself.

226



227 **Inverse data driven modelling indicates different regulation of amino and organic acid**  
228 **metabolism as well as sucrose cycling between accessions originating from warm and cold**  
229 **climates**

230 To investigate regulation of metabolism, reaction elasticities were calculated based on a  
231 method for inverse data driven modelling, which connects metabolite variance information  
232 with a metabolic network <sup>29,30</sup>. Metabolite data from the 6 °C condition of two subsets  
233 representing cold and warm Q1 climate were used for this approach. Calculations resulted in  
234 the biochemical Jacobian matrix, representing rate elasticities for both groups. Inverse  
235 approximation was performed in five independent replicates using different threshold values  
236 for the definition of cold and warm origin accessions (Figure S 4). To find the strongest  
237 differences in Jacobian entries between accessions originating from warm and cold regions,  
238 reaction elasticities, i.e., entries of the Jacobian matrix, were statistically analysed in a PCA  
239 (Figure 8). This analysis showed a clear separation between the two groups of origin on PC1  
240 (>50 %) indicating strong differences in the biochemical regulation in response to the cold  
241 growth condition. Absolute values of loading scores for the individual Jacobian matrix entries  
242 for PC1 were listed according to their influence on separation (Figure 9). Strongest changes in  
243 reaction elasticities were observed in fumarate metabolism, amino acid biosynthesis, sugar  
244 cleavage, and branched chain amino acid (BCAA) metabolism.

245 Jacobian entries related to fumarate metabolism had a strong influence on the separation of  
246 the two origin groups, pointing to a differential regulation of fumarate metabolism under low  
247 temperature, which is further highlighted by the strong correlation of SNPs in the promotor  
248 region of FUM2 with fumarate levels in the 6 °C condition (Figure 3c).

249 Reaction elasticities for glucose, which were related to sucrose cleavage, were different in the  
250 6 °C condition between the two origin groups. This, together with the link of hexose  
251 accumulation to Q1 climate of origin, pointed to different strategies in the central sucrose  
252 metabolism. Furthermore, SNPs in 6 invertase genes (AT1G35580, AT3G13784, AT1G12240,  
253 AT3G13790, AT1G62660, AT3G52600, AT4G09510) showed strong correlation with  
254 temperature of origin in the first months of the year in an analysis performed with the online  
255 tool GenoCLIM <sup>31</sup>.

256 Reaction elasticities in raffinose metabolism, represented by the dependency of raffinose on  
257 galactinol levels (galactinol --> raffinose) were observed to be very similar between the two

258 origin groups, indicated by a low loadings-score in the principal component analysis (Figure  
259 9). This finding reflected similar raffinose accumulation rates in both groups (Figure 7b). Even  
260 though the total concentrations of raffinose were significantly different (Figure 7a), the  
261 sensitivity of the respective metabolic system seemed to be very similar in the prevalent  
262 scenario.

263 Reaction elasticities related to alanine metabolism showed strong differences between the  
264 two origin groups (Figure 9), despite no apparent differences in accumulation or absolute  
265 concentration (Figure 7). Likewise, high loading scores for Jacobian entries of valine and  
266 isoleucine, i.e., branched chain amino acids (BCAAs), indicated its importance in cold  
267 acclimation strategies. Like for alanine, BCAAs did not differ significantly in their absolute  
268 concentration and accumulation rate between the origin groups (Figure 7). Generally, valine,  
269 isoleucine and alanine concentration did not contribute strongly in separating the growth  
270 conditions (6 °C and 16 °C) in the PCA based on the metabolite measurements (Figure 2), but  
271 rather added to the variance within the conditions, pointing to a high variance in these  
272 metabolites between the individual accessions, as well as to differences in the variance  
273 between accessions from colder and accessions from warmer climates.

274

### 275 **Relative growth rate was connected to different metabolite pools under cold growth** 276 **conditions**

277 To investigate correlations between metabolite levels and overall growth rates in both growth  
278 conditions, stepwise linear modelling was used to find the strongest connection between  
279 metabolism and growth. In the 6 °C growth condition, the resulting model contained  
280 phenylalanine, raffinose, serine, spermidine, and trehalose ( $R^2 = 0.26$ ,  $p = 2.64e-15$ ). When  
281 these correlations were investigated one by one, phenylalanine, spermidine, and trehalose  
282 correlated positively and raffinose and serine correlated negatively with overall growth rate.  
283 In the 16 °C condition, the model with the lowest RMSE contained asparagine, glycine, pyruvic  
284 acid, serine, spermidine, and trehalose ( $R^2 = 0.49$ ,  $p < 2.2e-16$ ). In this case, glycine,  
285 spermidine, and trehalose correlated positively and asparagine, pyruvic acid and serine  
286 correlated negatively with overall growth rate. Comparing the two models, three metabolites  
287 (serine, spermidine and trehalose) correlated with the growth rate in both conditions,  
288 indicating a general connection of growth with these metabolites, while phenylalanine and

289 raffinose occurred only in the model for 6 °C and asparagine, glycine and pyruvic acid were  
290 only contained in the model for growth in the 16 °C condition.

291

## 292 **Discussion**

### 293 **Natural habitat temperature in the first quarter of the year predicts the response of primary** 294 **metabolism in cold grown plants**

295 In previous studies, it has been described that freezing tolerance of cold acclimated plants  
296 significantly correlates with latitude of geographical origin of natural *Arabidopsis* accessions  
297 <sup>24,32</sup>. In the present study it was shown that the extent of primary metabolism response to  
298 growth at 6 °C is connected to geographical latitude as well, but a correlation with climatic  
299 variables revealed a much stronger connection to the temperature between January to  
300 March. The general direction of separation between the growth conditions in a PCA was  
301 similar for all included accessions, but the metabolic response to the 6 °C condition was  
302 stronger in plants originating from colder climates. A strong connection of freezing tolerance  
303 and the temperature in January could be linked to the expression level of CBFs in four Chinese  
304 *Arabidopsis* accessions <sup>33</sup>. Interestingly, no direct relation between genetic relatedness and  
305 freezing tolerance after acclimation was observed <sup>24</sup>, which strongly suggests that local  
306 adaptation to climate is the key driving factor for the cold response and freezing tolerance in *A.*  
307 *thaliana* <sup>34,35</sup>. Similarly, it has recently been shown, that grapevine varieties adapted to local  
308 climate deal better with abiotic stress in a range typical for the specific climate compared to  
309 widely used commercial varieties <sup>36</sup>. Climatic range boundaries of *A. thaliana* distribution  
310 were shown to be determined by a combination of temperature and precipitation <sup>7</sup>, which  
311 can explain the connection of temperature in Q1, and metabolic reaction to cold. In the  
312 present study, however, no significant correlation of metabolic distance and precipitation at  
313 the original habitat was detected. This lack of correlation suggests that, even though both,  
314 temperature and precipitation, limit the distribution range, the metabolic response to these  
315 factors is uncoupled from each other. Additionally, the correlation of metabolic distance with  
316 original habitat temperature was less significant in the warmer part of the year, i.e., between  
317 May and August (Figure 5). This allows us to speculate that the extent of metabolic response  
318 to low ambient temperature underlies selective pressure only by the temperature in the cold

319 part of the year, even though mean temperatures throughout the year also correlate to a  
320 strong extent. The increase in metabolic distance with decreasing Q1 temperature was  
321 predominantly driven by strong accumulation of raffinose, galactinol, fructose, glucose,  
322 citrate and malate (see Figure 7). Soluble sugars have been shown earlier to positively  
323 correlate with the capability of natural accessions to acclimate to low temperature and to  
324 increase freezing tolerance <sup>22</sup>. However, plant development and growth under low  
325 temperature results in a different metabolic constitution than observed for plants which were  
326 shifted from ambient to low temperature in mature stage for cold acclimation <sup>37</sup>. In particular,  
327 *Arabidopsis* leaves which developed at 5°C accumulated relatively high amounts of soluble  
328 sugars but, in contrast to cold shifted plants, released suppression of photosynthetic genes  
329 which the authors discussed to be essential for development of full freezing tolerance <sup>37</sup>.  
330 Although photosynthetic parameters were not quantified in the present study, correlation of  
331 metabolites with growth rates at 16 °C and 6 °C revealed a significantly positive correlation  
332 with spermidine and trehalose while phenylalanine only correlated positively under 6 °C.  
333 Interestingly, spermidine and trehalose have previously been found to correlate positively  
334 with growth under 20°C while phenylalanine correlated negatively under these conditions <sup>38</sup>.  
335 Following the discussion of Meyer and colleagues, who interpreted growth-correlated  
336 metabolites as positive (or negative) signals, this would indicate that also under low  
337 temperature spermidine and trehalose represent conserved growth signals. Consequentially,  
338 due to its negative correlation under ambient temperature <sup>38</sup> and a missing correlation with  
339 growth rate at 16 °C, phenylalanine would represent a cold-specific growth signal.  
340 Phenylalanine represents a central metabolic precursor for numerous secondary metabolites,  
341 e.g., flavonoids and lignin <sup>39,40</sup>. Hence, in contrast to spermidine and trehalose, which were  
342 rather discussed as pure growth signals than growth substrate molecules <sup>38</sup>, phenylalanine  
343 might play a more complex role and might serve as a central metabolic integrator for growth,  
344 development and stress protection under low temperature.

345 The metabolic response was predictable from genetic variation among the investigated  
346 genotypes (Figure 3a). Interestingly, the predictability improved gradually from the 16°C to  
347 the 6°C growth condition and showed the best predictability for metabolic distance (Figure 3  
348 a). Metabolic distance comprises the sum of all metabolite perturbations from reference  
349 growth (16°C) to stressed condition (6°C). Accordingly, it is the most comprehensive and

350 synergetic parameter for the description of the cold stress response in relation to the  
351 reference metabolome and, thus, correlates even stronger to genetic variation than individual  
352 metabolite concentrations.

353

354 **Cold-grown accessions originating from warmer and colder regions differ in the plasticity of**  
355 **primary metabolism**

356 Accessions from colder climates showed a stronger variability in their metabolic response  
357 under 6 °C. This was reflected in higher variance of metabolic distances when compared to  
358 accessions originating from warmer regions. The applied 6 °C growth condition seemed to  
359 trigger a highly conserved and less variable metabolic response in accessions originating from  
360 warmer climates, which might be explained by a reduced amplitude of extremely low  
361 temperatures in the original habitat. In plants from colder climates the metabolic response to  
362 cold was generally stronger, but also more diverse, which hints at a larger number of  
363 employed metabolic strategies in dealing with cold, and potentially also freezing stress,  
364 among the different accessions. For plants from colder regions which are regularly confronted  
365 with freezing events, the strategy to invest in a stronger metabolic response to cool  
366 temperatures, potentially preparing for even lower temperatures seems to be feasible, while  
367 plants from warmer regions react with smaller metabolic deviations when confronted with  
368 low temperatures, which indicates a strategy of trying to endure without investing too many  
369 resources in adaptation.

370 As a consequence of differential metabolite covariances, the calculated reaction elasticities,  
371 described by Jacobian matrices, revealed strong differences between accessions from cold  
372 and accessions from warm climates. In general, Jacobian matrices allow the investigation of  
373 causal relations between metabolites and point to differences in metabolic regulation. Most  
374 pronounced differences in Jacobian entries between accessions originating from cold and  
375 warm habitats were found in fumarate metabolism, sucrose cleavage and BCAA metabolism.  
376 Under low temperature, fumarate serves as a carbon sink in leaf metabolism, aiding in the  
377 acclimatisation of photosynthesis to a new homeostasis<sup>41</sup>. The differential accumulation of  
378 fumarate under stress in *A. thaliana* accessions with different cold acclimation potential could  
379 already be shown in an earlier study<sup>42</sup> and fumarase 2 (FUM2) was described to have a strong  
380 effect on carbon partition and growth rates in *A. thaliana* accessions<sup>43</sup>. Remarkably, both

381 absolute amount and accumulation rate of fumarate were not significantly correlated with  
382 the Q1 temperature of origin and therefore not different between the two origin groups in  
383 this study, which points to the importance of differences in reaction elasticity in this metabolic  
384 pathway, rather than absolute concentration differences in the cold response. Organic acids  
385 like fumarate play an important role in regulating the accumulation of solutes within the  
386 vacuole by controlling cold induced acidification <sup>44</sup>, which makes them a good target for  
387 metabolic regulation, as indicated by the differences in reaction elasticities.

388 The score for the influence of ornithine on the metabolic function of fumarate additionally  
389 points to the plastidial conversion of ornithine to arginine via ornithine carbamoyltransferase  
390 (OTC), argininosuccinate synthase (ASSY), and argininosuccinate lyase (ASL). This  
391 transformation is an important part of nitrogen cycling and homeostasis <sup>45,46</sup>. The connection  
392 of natural variation along the gradient of Q1 temperature of origin and this pathway is  
393 supported by the prevalence of a SNP in the ASL gene (At5g10920), which is highly correlated  
394 with temperature of origin in >1000 Arabidopsis accessions <sup>31</sup>. This points to differences in  
395 the extent of regulation of amino acid metabolism caused by cold temperature between  
396 accessions originating from colder and accessions originating from warmer climate. It has  
397 been shown that amino acid metabolism and nitrogen usage have to be heavily adjusted  
398 under stress conditions to allow survival in plants <sup>47-49</sup>.

399 Sucrose metabolism plays a central role in plant development, stress response and growth  
400 regulation, and its cyclic metabolism, composed of invertase-driven cleavage and cytosolic re-  
401 synthesis, represents an important buffer mechanism against environmental fluctuation <sup>50,51</sup>  
402 and the observed differences in reaction elasticities connected to sucrose metabolism  
403 strongly point to differences in regulation in this pathway between plants from warmer and  
404 colder habitats. While futile cycling of sucrose might stabilize the cellular energy status by  
405 providing electron acceptor molecules for photosynthesis and serve as an efficient  
406 mechanism to control carbon partitioning <sup>52</sup>.

407 Entries of the Jacobian matrix connected to alanine metabolism had strong discriminatory  
408 loadings between the origin groups in the PCA (see Figure 8). Alanine plays an important part  
409 in amino group transfer reactions in amino acid and protein biosynthesis and has been  
410 described to accumulate during cold exposure in various plant species <sup>53</sup>. Furthermore,

411 alanine serves as amino group donor in photorespiration to replace nitrogen taken out of the  
412 cycle in form of serine or glycine <sup>54,55</sup>.

413 The elasticities of reactions involved in BCAA metabolism, especially valine and isoleucine, are  
414 highly different between the investigated groups of origin at 6 °C. As for alanine there was no  
415 significant change in concentration, but the investigation of jacobian entries revealed that  
416 accessions from colder climates likely feature differences in regulation of this metabolic  
417 pathway, which has been shown to be strongly regulated in response to changes in  
418 environmental condition <sup>56,57</sup>.

419

## 420 **Conclusions**

421 Changes in ambient temperatures have different ecological implications in the different  
422 growth habitats of Arabidopsis. We could show that within a large group of accessions from  
423 diverse growth habitats, a significant connection of origin temperature from January to March  
424 and metabolic reaction to cold exists. Key pathways of primary metabolism were affected  
425 differently between accessions originating from cold or warm climates, not only in the  
426 amount of accumulated products, but also in the strategies of regulation. Furthermore, we  
427 could show that plants from colder regions employ a larger spectrum of metabolic responses  
428 to low ambient temperature.

429 While cool temperatures might be the signal for an upcoming frost period, implying long-term  
430 endurance for accessions coming from more northern, colder climates, in southern, warmer  
431 climates lower temperatures could rather indicate a short-term event requiring less adaption  
432 of metabolism. Thus, the observed differences in metabolic regulation while growing in cold  
433 conditions indicate two different strategies. Preparation for even more adverse, freezing  
434 conditions in accessions from colder climates, or trying to survive the current, mild stress  
435 situation while preparing for a fast recovery after the end of the cold phase in accessions from  
436 warmer climates. Additionally, the necessity of developing new strategies to deal with cool  
437 temperatures is of low importance for accessions from warm climates, resulting in low  
438 variance of metabolic responses, compared to accessions from climates, which are regularly  
439 exposed to sub-zero temperatures.

440

## 441 **Methods:**

### 442 **Experimental design and plant growth**

443 Seeds of 241 natural accessions (Supplemental Table 3) of *A. thaliana* described in the 1001  
444 genomes project<sup>28</sup> were sown on sieved (6 mm) substrate (Einheitserde ED63). Pots were  
445 filled with 71.5 g ±1.5 g of soil to assure homogenous packing. The prepared pots were all  
446 covered with blue mats<sup>58</sup> to enable a robust performance of the high-throughput image  
447 analysis algorithm. Stratification was done for 4 days at 4 °C in the dark, upon which the seeds  
448 were germinated and seedlings established at 21 °C for 14 days (relative humidity: 55 %; light  
449 intensity: 160 μmol m<sup>-2</sup> s<sup>-1</sup>; 14 h light). The temperature treatments were started by  
450 transferring the seedlings to either 6 °C or 16 °C. To simulate natural conditions temperatures  
451 fluctuated diurnally between 16-21 °C, 0.5-6 °C and 8-16 °C for respectively the 21 °C initial  
452 growth conditions and the 6 °C and 16 °C treatments (Fig. S X). Relative humidity (55 - 95 %)  
453 and light intensity (160 μmol m<sup>-2</sup> s<sup>-1</sup>) were kept the same for all experiments. Daylength was  
454 9h during the 16 °C and 6 °C treatments and 14h during the 21 °C initial growth conditions.  
455 Each temperature treatment was repeated three times. Five replicate plants were grown for  
456 every genotype per experiment. Plants were randomly distributed across the growth chamber  
457 with an independent randomisation pattern for each experiment. During the temperature  
458 treatments (14 DAS – 35 DAS), plants were photographed twice a day (1 hour. after/before  
459 lights switched on/off), using an RGB camera (IDS uEye UI-548xRE-C; 5MP) mounted to a  
460 robotic arm. At 35 DAS, whole rosettes were harvested, immediately frozen in liquid nitrogen  
461 and stored at -80 °C until further analysis. Rosette areas were extracted from the plant images  
462 using Lemnatec OS (LemnaTec GmbH, Aachen, Germany) software. Growth parameters were  
463 obtained through non-linear modelling. Plant sizes did not reach a plateau phase, therefore  
464 we opted for power-law function as described by Paine<sup>59</sup>.

$$465 \quad \frac{dM}{dt} = rM^\beta$$

466 *Equation 1*

467

$$468 \quad M_t = (M_0^{1-\beta} + rt(1 - \beta))^{1/1-\beta}$$

469 *Equation 2*



470 The power-law function is described with three parameters:  $M_{0/t}$  is the plant size at time  
471 point 0 or timepoint t, respectively; r is the overall growth rate; beta is scaling factor for the  
472 growth rates, letting growth rates increase or decrease with plant size. Parameter estimates  
473 for each accession were obtained in a three-step procedure. First, non-linear regression was  
474 performed for each individual plant using the nlsList function<sup>60</sup> with the power-law selfStart  
475 function (Equation 2) from Paine<sup>59</sup>. In a second step, the initially obtained parameter  
476 estimates were used to define priors for Bayesian nonlinear modelling. The brm function<sup>61</sup>  
477 was used to model growth with Equation 2 for each individual plant.

478 priors were defined for  $M_0$ , r and beta as follows:

$$479 \quad M_0 \sim \text{Normal}(\mu_{a,r}, 0.2)$$

$$480 \quad r \sim \text{Normal}(\mu_{a,t}, \sigma_{a,t})$$

$$481 \quad \beta \sim \text{Normal}(0.87, 0.005)$$

482 For  $M_0$   $\mu_{a,r}$  was defined as the median  $M_0$  estimate from the non-linear regression for  
483 accession a in replicate r. For the overall growth rate  $\mu_{a,t}$  was defined as the median r estimate  
484 from the non-linear regression for accession a in temperature t,  $\sigma_{a,t}$  was defined as the  
485 standard deviation of the r estimates obtained from the non-linear regression for accession a  
486 in temperature t.

487 For every accession, estimates for each growth parameter in each temperature were  
488 obtained from a mixed model<sup>60</sup> with accession, temperature and their interaction as fixed  
489 effects and experiment as random factor. Estimates for each accession in each temperature  
490 were then calculated as estimated marginal means<sup>62</sup>.

#### 491 **Metabolite quantification and profiling via gas chromatography coupled to mass** 492 **spectrometry (GC-MS)**

493 Frozen leaf material was homogenized in a ball mill (Retsch GmbH, Haan, Germany). Polar  
494 metabolites were extracted and measured on gas chromatography coupled to mass  
495 spectrometry as previously described<sup>50</sup>, with slight modifications. In brief, homogenized plant  
496 material was extracted with a methanol-chloroform-water mixture (MCW, 2.5/1/0.5, v/v/v)  
497 on ice for 15 min, which was split in a polar and an apolar fraction by addition of water after  
498 extraction. Subsequently, pellets were re-extracted twice using 80% ethanol at 80 °C for 30

499 minutes. Ethanol extracts were combined with the polar phase of the MCW extraction and  
500 dried in a vacuum concentrator (ScanVac, LaboGene, Allerød, Denmark). To compensate  
501 technical variance in the measurements, two internal standards, i.e. pentaerythritol and  
502 phenyl b-D-glucopyranoside (both Sigma-Aldrich) were spiked to the extracts before drying.  
503 Dry extracts were derivatized by methoximation for 90 min at 30°C with methoxylamine  
504 hydrochloride (Merck KGaA, Darmstadt, Germany) in pyridine and silylation for 30 min at 37°C  
505 with N-Methyl-N-(trimethylsilyl) trifluoroacetamide (MSTFA, Macherey – Nagel, Düren,  
506 Germany). Measurements were conducted on a LECO Pegasus® GCxGC-TOF mass  
507 spectrometer (LECO Corporation, St. Joseph, USA) coupled to an Agilent 6890 gas  
508 chromatograph (Agilent Technologies®, Santa Clara, USA) using an Agilent HP-5MS column  
509 (length: 30 m, inner diameter: 0.25 mm, film: 0.25 mm). For targeted analysis, baseline  
510 correction, chromatogram deconvolution, peak finding, retention index calculation and peak  
511 area extraction were done in the software LECO Chromatof®. Retention index calculation was  
512 conducted by measuring a mixture of linear alkanes (C12-C40) with every measurement  
513 batch. All metabolites included in the targeted analysis were identified and quantified by  
514 measuring a mixture of pure standard compounds in different concentrations in every  
515 measurement batch. Areas of each metabolite were normalised to the internal standard with  
516 a minimum distance of retention time to the metabolite. Internal standard normalized areas  
517 were then normalized to the slope of peak areas of the corresponding externally measured  
518 standard row and to sample fresh weight yielding the absolute amount of metabolites [ $\mu\text{mol}$   
519  $\text{gFW}^{-1}$ ]. The data table containing all metabolite quantifications can be found in the  
520 supplement (Supplemental Table 4).

## 521 **Statistical analysis**

522 Statistical analyses were conducted within the free statistical software environment R<sup>63</sup>. Data  
523 manipulation, summarisation and plotting was conducted using the R package *tidyverse*<sup>64</sup>.

524 Principal component analysis (PCA) was performed within R, after scaling and centering of  
525 metabolite data. The plot was visualised using the R package *ggfortify*<sup>65</sup>. To calculate  
526 metabolic distances, multidimensional means (centroids) using the first 15 principal  
527 components (PCs) were built for each natural *Arabidopsis* accession in both conditions.  
528 Coordinates of centroids were consecutively used for the calculation of Euclidian distances

529 between the centroid of the 6 °C and the 16 °C growth condition for each accession,  
530 representing the metabolic distances <sup>66</sup>.

531 Spearman correlation coefficients and p-values for single correlations were calculated using  
532 the R package *Hmisc* <sup>67</sup>. Climate and bioclimatic data were taken from the WorldClim  
533 Database <sup>68</sup>, which was further used to calculate summary variables as three month means.  
534 The worldClim2 data was linked to each natural *Arabidopsis* accession based on longitude and  
535 latitude of their origin.

536 Stepwise backwards linear regression modelling and partial least square discriminant analysis  
537 (PLS-DA) were conducted within the R packages *caret* <sup>69</sup> and *leaps* <sup>70</sup>, employing five times  
538 repeated 10-fold cross-validation. Model selection was based on minimizing RMSE in cross-  
539 validation (root-mean-square-error). Ridge regression, and Lasso selection were fitted with  
540 the R package *glmnet* <sup>71</sup> by splitting the dataset into training data (75 %) and test data (25 %)  
541 and selecting the penalty parameter  $\lambda$  (lambda) by minimising MSE (mean square error).

542 Population-structure-corrected correlation coefficients were calculated using the  
543 *mantel.partial* function included in the R package *vegan* <sup>72</sup> correcting the correlations with a  
544 genetic kinship matrix <sup>28</sup>.

545 Broad sense heritabilities were calculated as the ratio between genetic variation and total  
546 phenotypic variation. Variances were estimated from a random effect model (lme function in  
547 nlme package <sup>60</sup>; R), with genotype as random effect. Genetic variance was the variance  
548 allocated to the random effect 'genotype', total phenotypic variance was the sum of the  
549 random effect and residual variance (VarCorr function in nlme package <sup>60</sup>; R).

550

### 551 **Data-driven inverse modelling**

552 Calculation of Jacobian matrices was conducted as previously described <sup>30,73</sup>. In brief,  
553 covariance data, calculated directly from the metabolite concentrations in the 6 °C condition  
554 for the two origin groups of *Arabidopsis* accessions, which were defined by maximum Q1 (first  
555 three months of the year) temperature of origin, under both applied growth conditions were  
556 connected with biochemical network information and used for an inverse approximation of  
557 biochemical Jacobian matrices. The calculations were repeated five times, varying the

558 quantile threshold for the definition of the two origin groups (20 %, 80 %; 23 %, 77 %; 24 %,  
559 76 %; 25 %, 75 %; 26 %, 74 %, upper and lower quantiles of tmax\_01\_02\_03 temperature  
560 respectively). For each variation threshold, the inverse calculation of Jacobian matrices was  
561 conducted  $1 \times 10^4$  times and the resulting median was normalized to the inverse variance of  
562 all calculations. Each calculation was repeated  $1 \times 10^4$  times and a median was taken and  
563 normalized to the inverse variance of all calculations. The calculations were done using the  
564 numerical software environment MATLAB® (R2019b).

565

### 566 **Genomic prediction**

567 SNP information was obtained from the Arabidopsis 1001 genome project information portal  
568 (SNPEFF file, version 3.1). Requiring all of the 241 accessions to have a valid (no "." character)  
569 and homozygous allele call, and furthermore requiring the minor allele to be present in at  
570 least 10 accessions (minor allele frequency (MAF) = 4.1% of all 241 accessions) resulted in  
571 5,613 unique SNPs. Given a genome size of approximately ~135 Mb and considering an  
572 average linkage-disequilibrium (LD) distance of 10Kb<sup>74,75</sup>, SNP coverage was deemed too low  
573 (one SNP every 24Kb). Hence, we tolerated one accession to have no valid allele call yielding  
574 25,826 unique SNPs (with MAF>4.1%, 10 accessions), corresponding to an average coverage  
575 of 5.2Kb per SNP, i.e. within the average LD) distance. In case of missing allele information,  
576 the population mean was taken as the imputed value. Alleles were encoded as -1 and 1 to  
577 reflect the two different diploid homozygous genotypes. Metabolite level data of the 37  
578 profiled metabolites were log-transformed to render their distributions more concordant  
579 with a normal distribution.

580 Genomic prediction was performed applying the Best Linear Unbiased Predication (BLUP)  
581 methodology as implemented in the R-package "rrBLUP"<sup>27</sup> (Cross-validation (split of  
582 accessions into training and test population) was performed on 180 (training)/61 (test)  
583 random accession splits. As a metric of predictability, Pearson correlation coefficients of  
584 predicted vs. observed metabolite level data (log-transformed) were computed and reported  
585 over all 37 profiled metabolites.

586 Genome wide association analysis (GWAS) was performed to test associations between SNPs  
587 and metabolite levels for each of the metabolites, at either 16 °C or 6 °C. SNPs for all 241

588 accessions were obtained from the 1001 genomes project ([www.1001genomes.org](http://www.1001genomes.org)) and  
589 filtered to have a minor allele frequency above 5%. GWAS was done using the single trait test  
590 implemented in LIMIX <sup>76</sup>. A relatedness matrix was added as covariate to the mixed effects  
591 model in order to correct for population structure.

## 592 **Acknowledgements:**

593 We would like to thank Klara Wuketich and Anneliese Auer for technical support during the  
594 phenotyping experiments. Further, we thank Matthias Nagler for assisting with sample  
595 preparation, Lena Fragner and Martin Brenner for technical assistance and Lisa Fürtauer for  
596 critical discussion. The Vienna BioCenter Core Facilities GmbH (VBCF) Plant Sciences Facility  
597 acknowledges funding from the Austrian Federal Ministry of Education, Science and Research  
598 and the City of Vienna. This work was supported by the Vienna Metabolomics Center (ViME)  
599 at the University of Vienna, and by TRR175, funded by Deutsche Forschungsgemeinschaft  
600 (DFG).

601

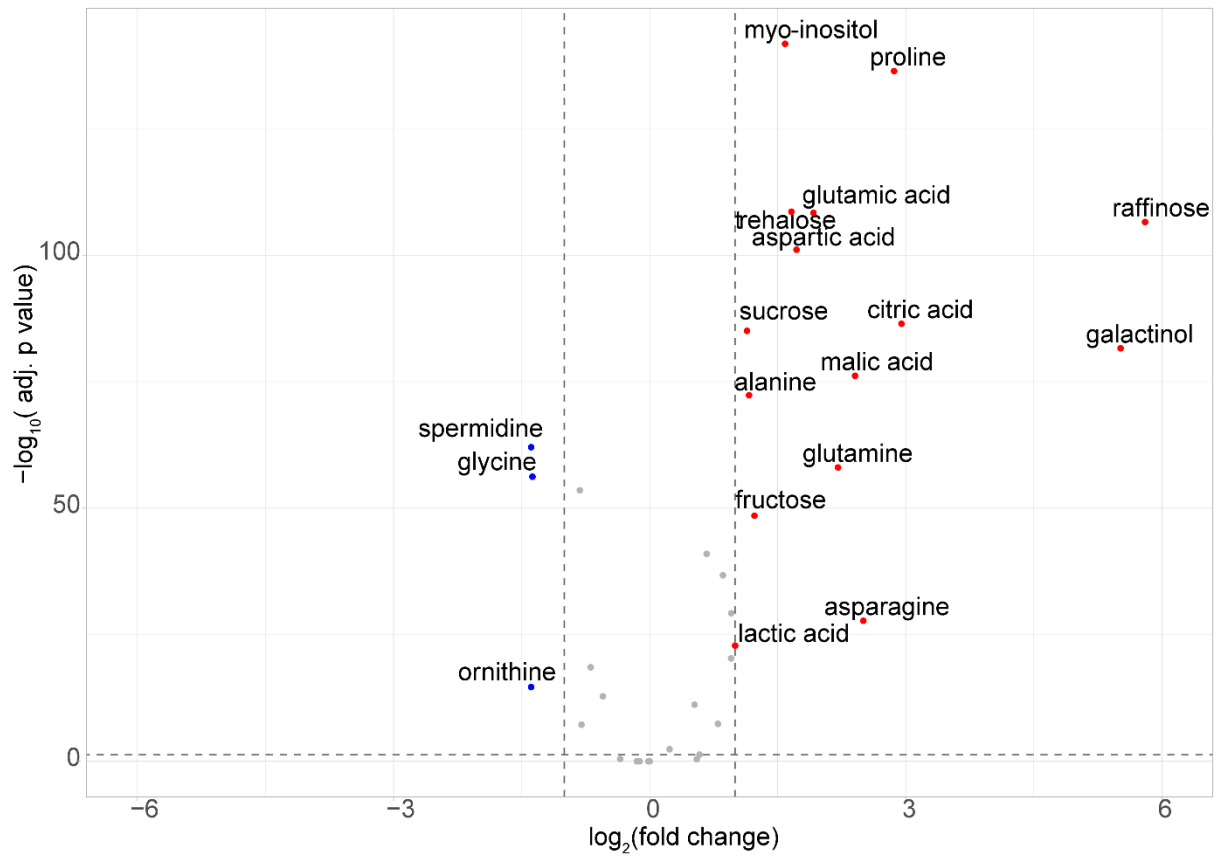

602

603 *Figure 1 Volcano plot of targeted GC-MS data, depicting fold changes and significance of difference (p-values calculated by*  
604 *ANOVA, adjusted with Bonferroni correction) of metabolites between the 16 °C and the 6 °C growth condition (ratio*  
605 *c(6 °C)/c(16 °C)). Red dots depict metabolites with fold change  $\geq 2$  ( $\geq 1$  on log<sub>2</sub> scale) and p-value  $\leq 0.05$  ( $\geq 1.3$  on negative*  
606 *log<sub>10</sub> scale). Blue dots depict metabolites with fold change  $\leq 0.5$  ( $\leq -1$  on log<sub>2</sub> scale) and p-value  $\leq 0.05$  ( $\geq 1.3$  on negative*  
607 *log<sub>10</sub> scale).*

608

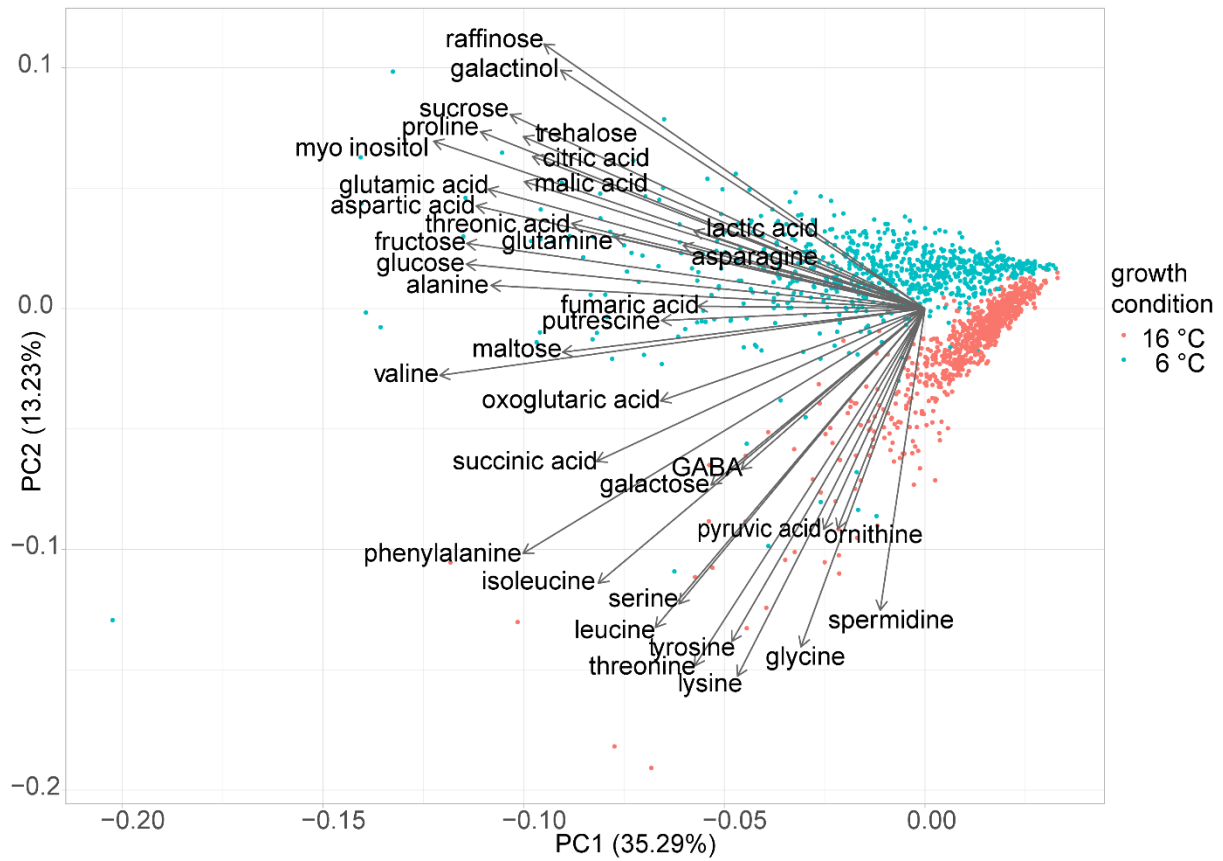

609

610 *Figure 2 Principal Component Analysis (biplot) of targeted GC-MS data. Red dots represent samples grown at 16 °C; blue dots*  
611 *represent samples grown at 6 °C, arrows denote loadings of metabolites on PC1 and PC2, respectively.*

612

613

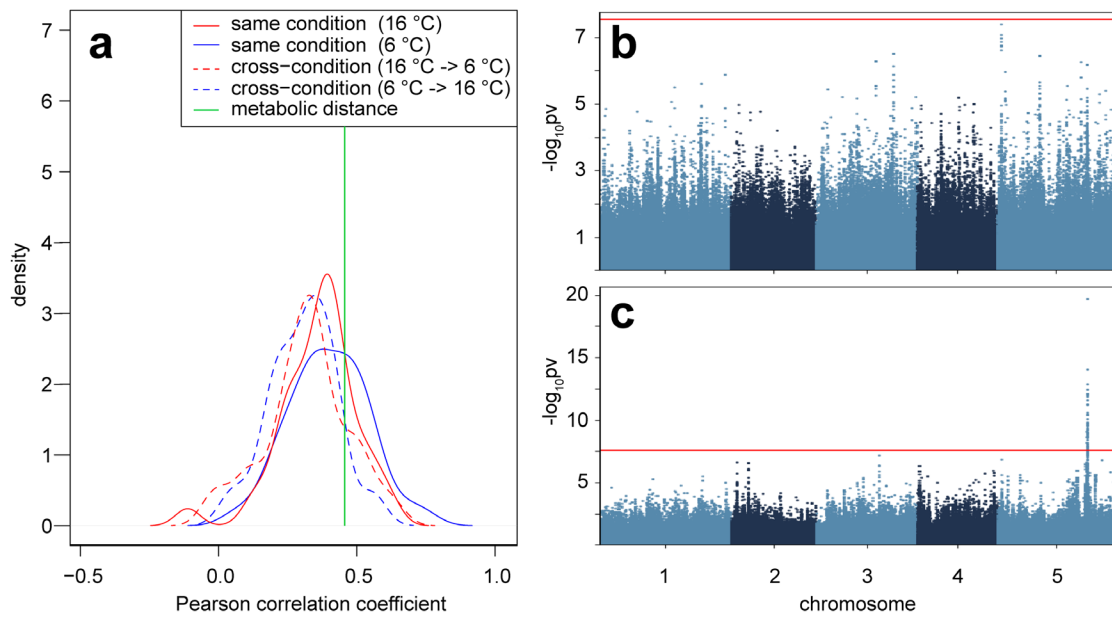

614

615 *Figure 3 a- Prediction accuracy of genomic prediction by BLUP shown as kernel density functions of Pearson correlation*  
616 *coefficients of predicted versus measured concentrations of 37 metabolites. Solid lines show accuracy of predictions based on*  
617 *a subset of the same condition (red – 16 °C, blue – 6 °C) and dashed lines show predictions based on a subset of the other*  
618 *condition (red – subset of the 16 °C metabolite profiles predicting 6 °C profiles; blue – a subset of 6 °C profiles predicting 16 °C*  
619 *profiles). The green line shows the prediction accuracy for the metabolic distance which is the overall change from 16 °C to*  
620 *6 °C growth conditions (for more details see text). b- mGWAS of fumarate concentration in the 16 °C condition, red line*  
621 *indicates significance threshold after Bonferroni correction. c- mGWAS of fumarate concentration in the 6 °C condition, red*  
622 *line indicates significance threshold after Bonferroni correction, the peak in chromosome 5 corresponds to the FUM2 gene.*

623



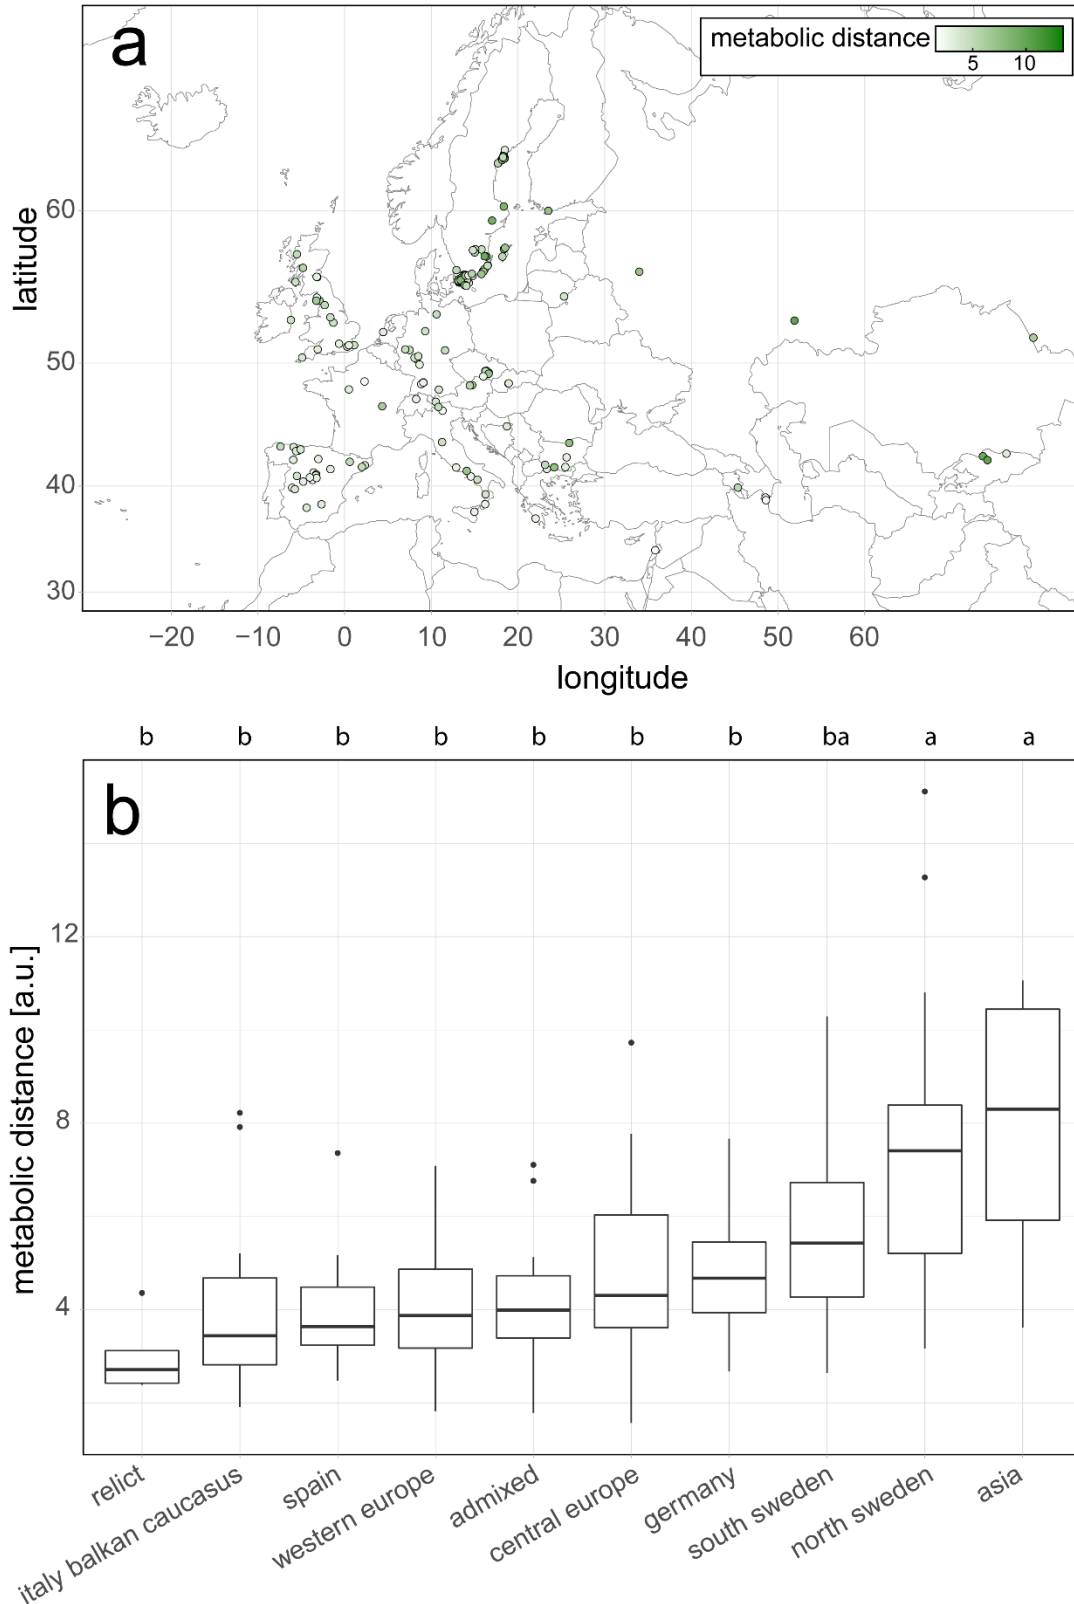

624

625 *Figure 4 a – Map of included natural Arabidopsis accessions, colour corresponds to metabolic distance between 16 °C and*  
626 *6 °C growth condition (4 Asian accessions not shown). b - Metabolic distances of Arabidopsis natural accessions, grouped by*  
627 *genetic admixture group. Letters denote significance groups according to ANOVA with a Tukey- HSD post-hoc test.*

628

629

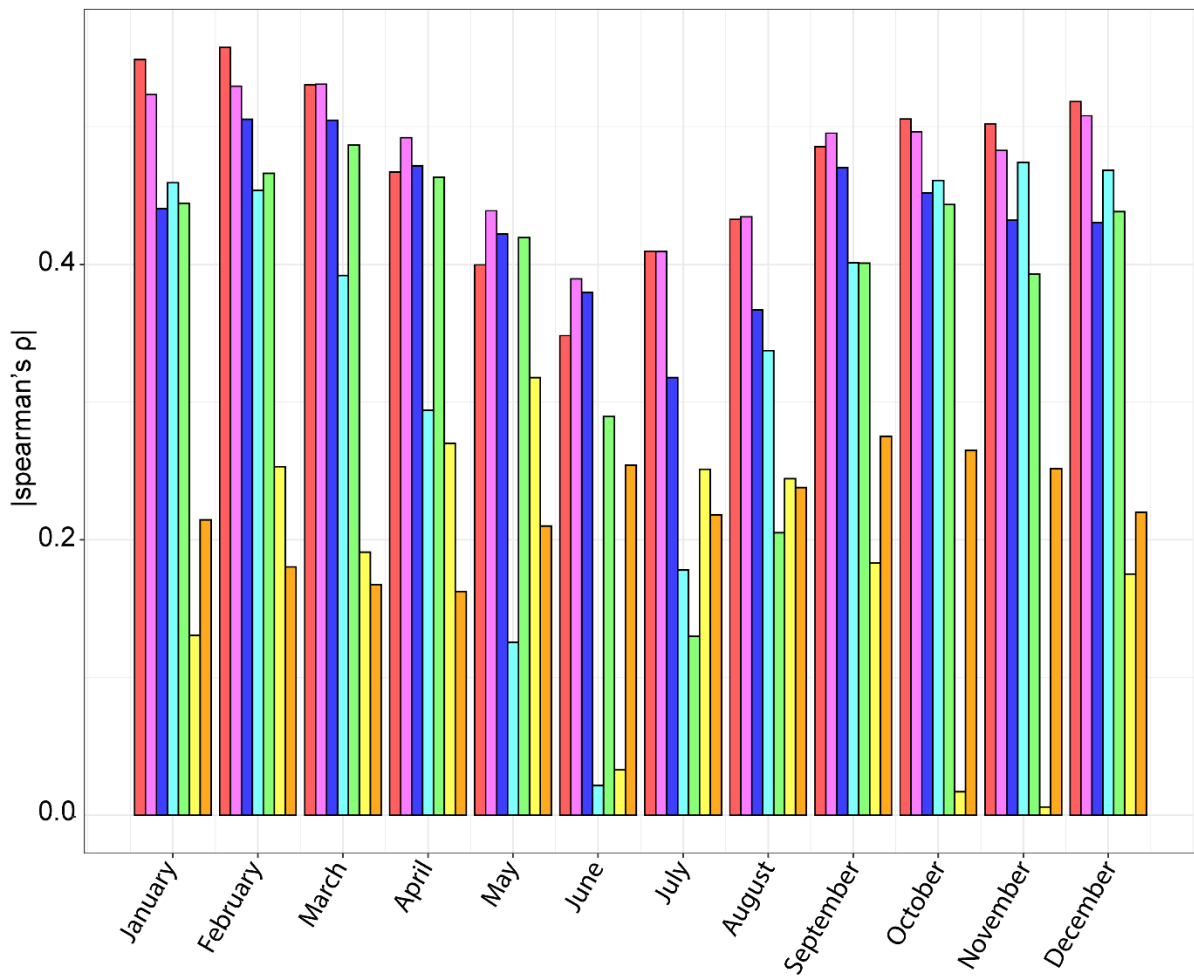

630

631 *Figure 5 Spearman's rho (absolute values) describing the relation between metabolic distance and climate of origin for each*  
632 *month (Jan-Dec). red – temperature maximum, pink – temperature average, blue – temperature minimum, teal – solar*  
633 *radiation, green – water vapour pressure, yellow – precipitation, orange – wind speed*

634

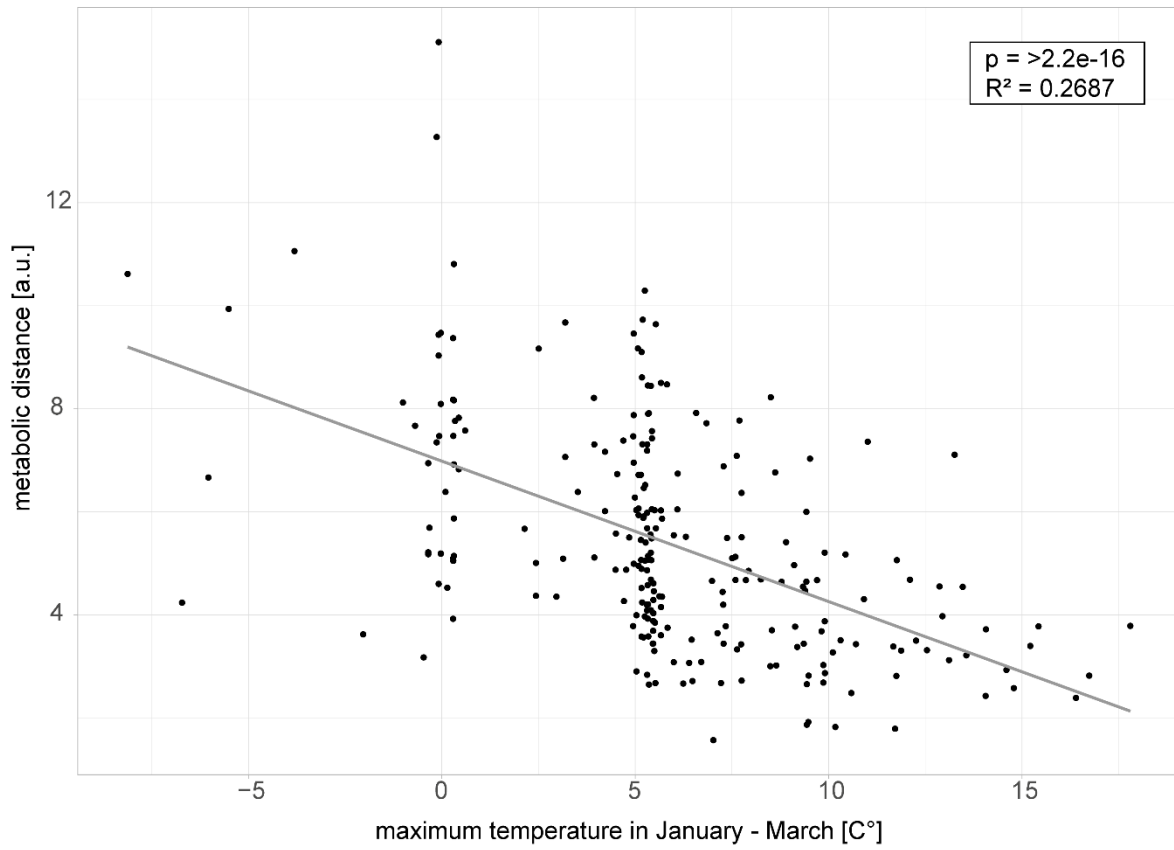

635

636 *Figure 6 Relationship of maximum Q1 temperature (January – March) and metabolic distance (n=241).  $R^2 = 0.2687$ ,  $p = <2.2e-$*   
637 *16, Spearman's  $\rho = -0.55$ .*

638

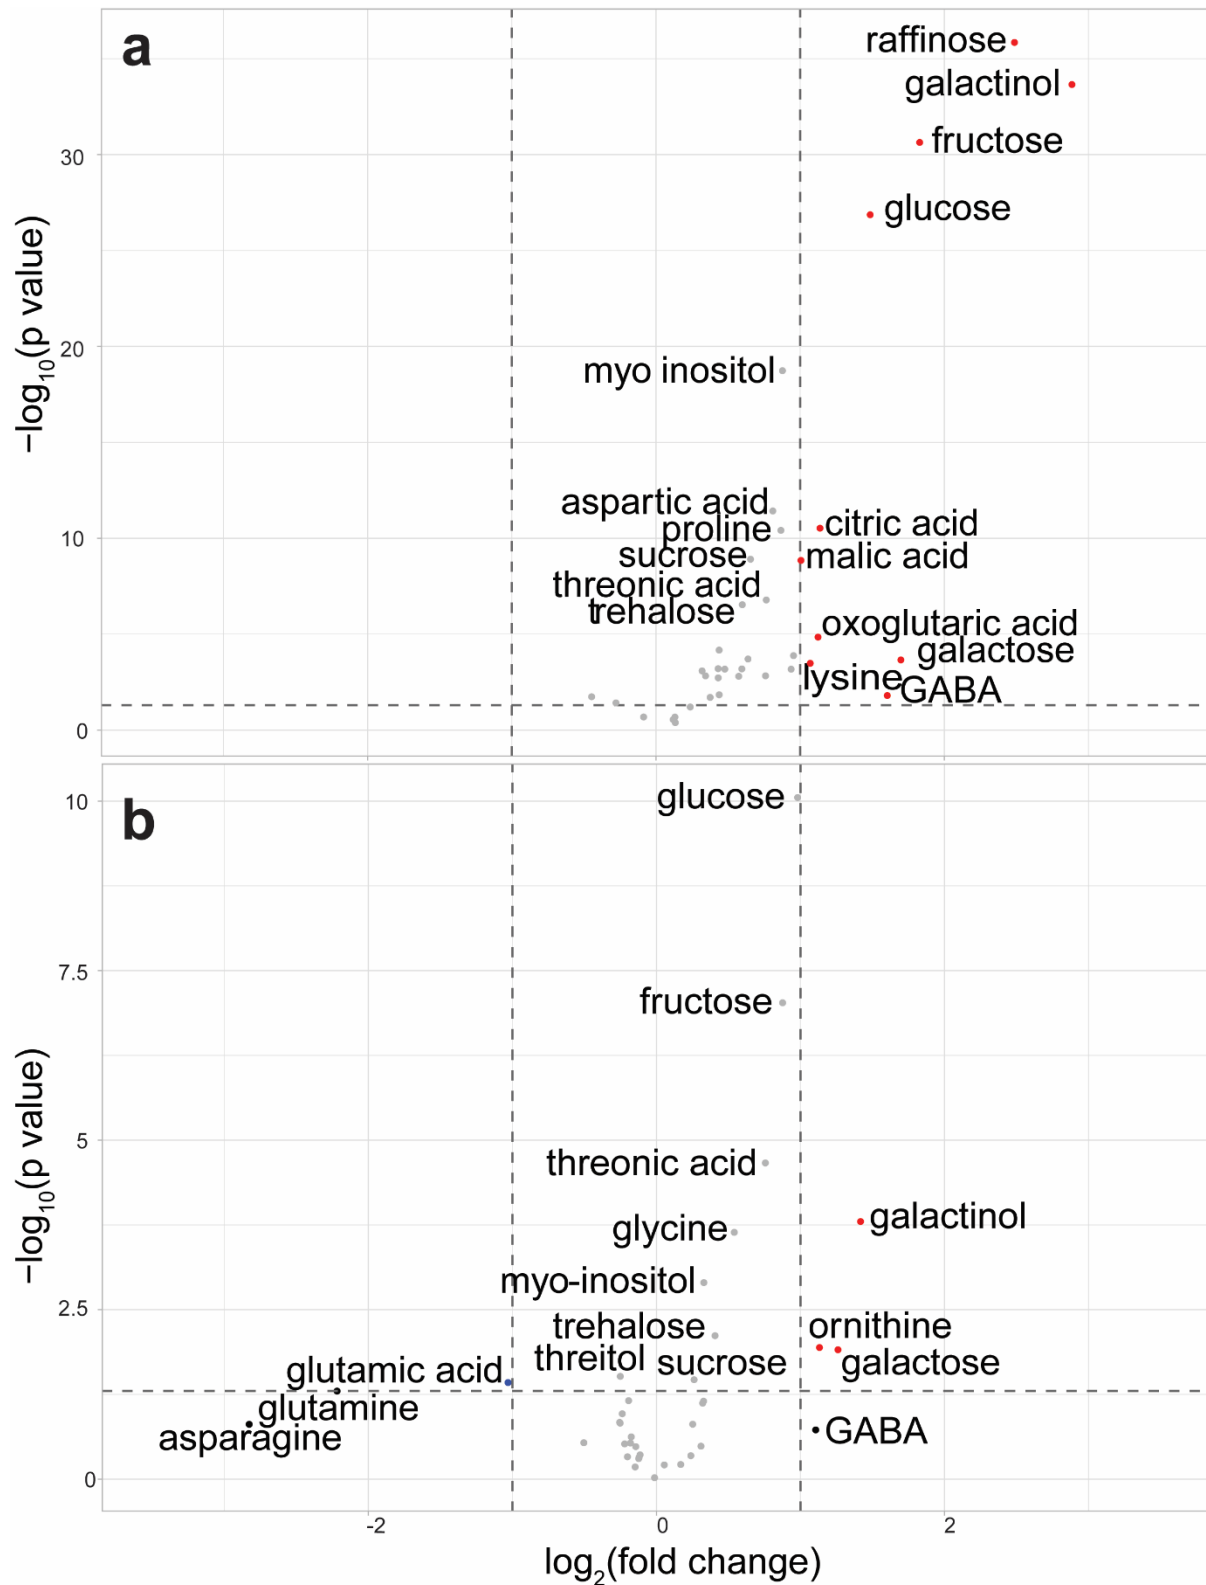

639

640

641

642

643

644

Figure 7 Volcano plots of differences between accessions originating from cold climate (< 4.71 °C maximum Q1 temperature) and accessions from warm climates (> 7.93 °C maximum Q1 temperature). A – Differences in absolute metabolite concentration in the cold growth condition; B- Differences in accumulation (Metabolite concentration 6 °C/ Metabolite concentration 16 °C).

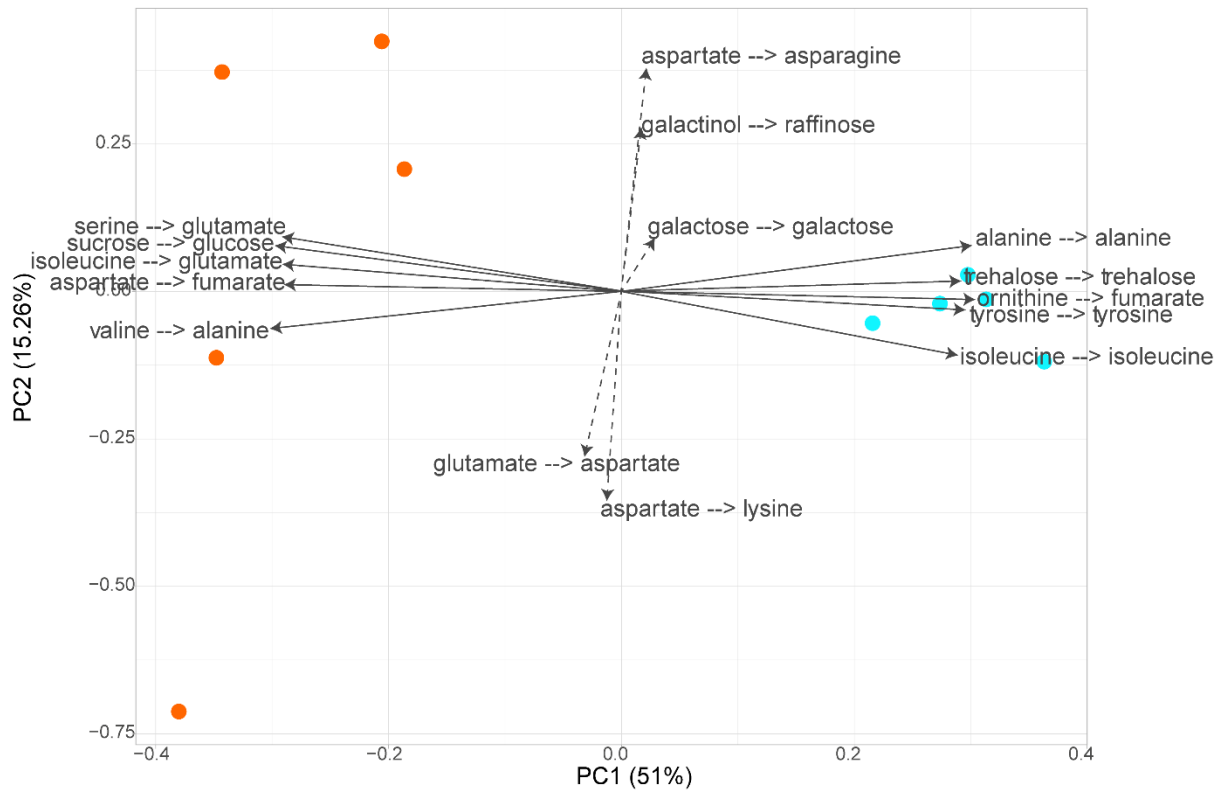

645

646 *Figure 8 Principal component analysis (PCA) of Jacobian matrix entries of accessions from cold (teal) and warm (orange)*  
647 *origins. Five Variations of quantile threshold in definition of cold and warm are depicted ((20 %, 80 %; 23 %, 77 %; 24 %, 76 %;*  
648 *25 %, 75 %; 26 %, 74 %). Jacobian matrices were calculated from covariance matrices based on metabolite data from plants*  
649 *grown in the 6 °C condition. Depicted are the 10 strongest loadings (lines) and the 5 weakest loadings (dashed lines) for PC,*  
650 *X --> Y = Metabolic function Y depending on metabolite X 1. Orange – warmer origin, teal – colder origin.*

651

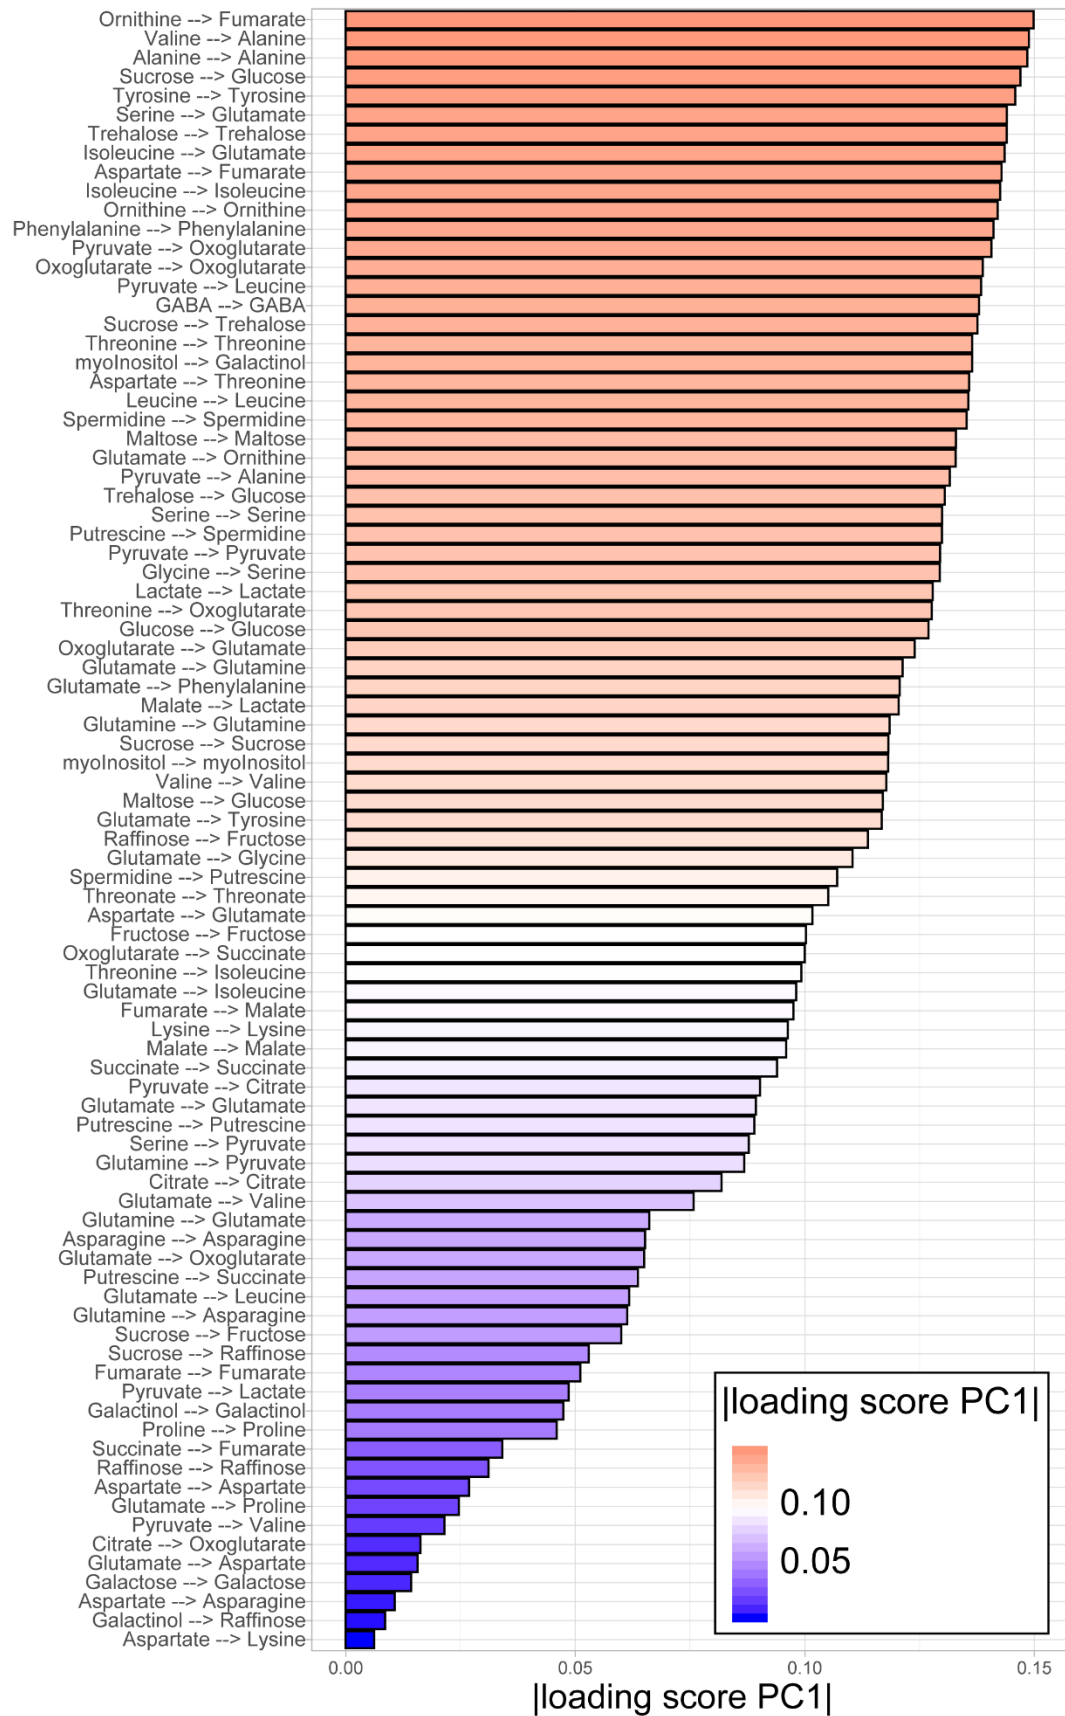

652

653

654

Figure 9: Absolute loading scores of Jacobian matrix entries, representing the contribution to separating the two origin groups on PC1; X → Y = Metabolic function Y depending on metabolite X

655

- 656 1 Krasensky, J. & Jonak, C. Drought, salt, and temperature stress-induced metabolic rearrangements and regulatory  
657 networks. *Journal of Experimental Botany* **63**, 1593-1608, doi:10.1093/jxb/err460 (2012).
- 658 2 Caldana, C. *et al.* High-density kinetic analysis of the metabolomic and transcriptomic response of Arabidopsis to  
659 eight environmental conditions. *Plant J* **67**, 869-884, doi:10.1111/j.1365-313X.2011.04640.x (2011).
- 660 3 Weston, D. J. *et al.* Comparative physiology and transcriptional networks underlying the heat shock response in  
661 *Populus trichocarpa*, *Arabidopsis thaliana* and *Glycine max*. *Plant, Cell & Environment* **34**, 1488-1506,  
662 doi:10.1111/j.1365-3040.2011.02347.x (2011).
- 663 4 Demirel, U. *et al.* Physiological, Biochemical, and Transcriptional Responses to Single and Combined Abiotic Stress  
664 in Stress-Tolerant and Stress-Sensitive Potato Genotypes. *Frontiers in Plant Science* **11**,  
665 doi:10.3389/fpls.2020.00169 (2020).
- 666 5 Shankar, R., Bhattacharjee, A. & Jain, M. Transcriptome analysis in different rice cultivars provides novel insights  
667 into desiccation and salinity stress responses. *Scientific Reports* **6**, 23719, doi:10.1038/srep23719 (2016).
- 668 6 Barah, P. *et al.* Genome-scale cold stress response regulatory networks in ten Arabidopsis thaliana ecotypes. *BMC*  
669 *Genomics* **14**, 722, doi:10.1186/1471-2164-14-722 (2013).
- 670 7 Hoffmann, M. H. Biogeography of Arabidopsis thaliana ( L .). *Journal of Biogeography* **29**, 125-134,  
671 doi:10.1046/j.1365-2699.2002.00647.x (2002).
- 672 8 Hurry, V. Metabolic reprogramming in response to cold stress is like real estate, it's all about location. *Plant, Cell &*  
673 *Environment* **40**, 599-601, doi:10.1111/pce.12923 (2017).
- 674 9 Larcher, W. Effects of low temperature stress and frost injury on plant productivity. *Physiological processes limiting*  
675 *plant productivity*, 253-269 (1981).
- 676 10 Thakur, P., Kumar, S., Malik, J. A., Berger, J. D. & Nayyar, H. Cold stress effects on reproductive development in  
677 grain crops: An overview. *Environmental and Experimental Botany* **67**, 429-443,  
678 doi:<https://doi.org/10.1016/j.envexpbot.2009.09.004> (2010).
- 679 11 Mahajan, S. & Tuteja, N. Cold, salinity and drought stresses: an overview. *Archives of biochemistry and biophysics*  
680 **444**, 139-158 (2005).
- 681 12 Patzke, K. *et al.* The Plastidic Sugar Transporter pSuT Influences Flowering and Affects Cold Responses. *Plant Physiol*  
682 **179**, 569-587, doi:10.1104/pp.18.01036 (2019).
- 683 13 Levitt, J. *Responses of Plants to Environmental Stresses*. (Academic Press, INC, 1980).
- 684 14 Herrmann, H. A., Schwartz, J.-M. & Johnson, G. N. Metabolic acclimation—a key to enhancing photosynthesis in  
685 changing environments? *Journal of Experimental Botany* **70**, 3043-3056, doi:10.1093/jxb/erz157 (2019).
- 686 15 Thomashow, M. F. Molecular Basis of Plant Cold Acclimation: Insights Gained from Studying the CBF Cold Response  
687 Pathway. *Plant Physiology* **154**, 571-577, doi:10.1104/pp.110.161794 (2010).
- 688 16 Gehan, M. A. *et al.* Natural variation in the C-repeat binding factor cold response pathway correlates with local  
689 adaptation of Arabidopsis ecotypes. *Plant J* **84**, 682-693, doi:10.1111/tpj.13027 (2015).
- 690 17 Ding, Y., Shi, Y. & Yang, S. Molecular regulation of plant responses to environmental temperatures. *Mol Plant* **13**,  
691 544-564, doi:10.1016/j.molp.2020.02.004 (2020).
- 692 18 Koornneef, M., Alonso-Blanco, C. & Vreugdenhil, D. Naturally Occurring Genetic Variation in Arabidopsis Thaliana.  
693 *Annual Review of Plant Biology* **55**, 141-172, doi:10.1146/annurev.arplant.55.031903.141605 (2004).
- 694 19 Mitchell-Olds, T. & Schmitt, J. Genetic mechanisms and evolutionary significance of natural variation in Arabidopsis.  
695 *Nature* **441**, 947-952, doi:10.1038/nature04878 (2006).
- 696 20 Nordborg, M. *et al.* The pattern of polymorphism in Arabidopsis thaliana. *PLoS biology* **3** (2005).
- 697 21 Kleessen, S. *et al.* Structured patterns in geographic variability of metabolic phenotypes in Arabidopsis thaliana.  
698 *Nature Communications* **3**, 1317-1319, doi:10.1038/ncomms2333 (2012).
- 699 22 Hannah, M. A. *et al.* Natural genetic variation of freezing tolerance in Arabidopsis. *Plant Physiol* **142**, 98-112,  
700 doi:10.1104/pp.106.081141 (2006).
- 701 23 Horton, M. W., Willems, G., Sasaki, E., Koornneef, M. & Nordborg, M. The genetic architecture of freezing tolerance  
702 varies across the range of Arabidopsis thaliana. *Plant Cell Environ* **39**, 2570-2579, doi:10.1111/pce.12812 (2016).
- 703 24 Zuther, E., Schulz, E., Childs, L. H. & Hinch, D. K. Clinal variation in the non-acclimated and cold-acclimated freezing  
704 tolerance of Arabidopsis thaliana accessions. *Plant, Cell and Environment* **35**, 1860-1878, doi:10.1111/j.1365-  
705 3040.2012.02522.x (2012).
- 706 25 Martínez-Berdeja, A. *et al.* Functional variants of DOG1 control seed chilling responses and variation in seasonal  
707 life-history strategies in Arabidopsis thaliana. *Proceedings of the National Academy of Sciences* **117**, 2526-2534,  
708 doi:10.1073/pnas.1912451117 (2020).
- 709 26 Adams, W. W., Stewart, J. J., Cohu, C. M., Muller, O. & Demmig-Adams, B. Habitat Temperature and Precipitation  
710 of Arabidopsis thaliana Ecotypes Determine the Response of Foliar Vasculature, Photosynthesis, and Transpiration  
711 to Growth Temperature. *Frontiers in Plant Science* **7**, doi:10.3389/fpls.2016.01026 (2016).
- 712 27 Endelman, J. B. Ridge Regression and Other Kernels for Genomic Selection with R Package rrBLUP. *The Plant*  
713 *Genome* **4**, 250-255, doi:10.3835/plantgenome2011.08.0024 (2011).
- 714 28 The 1001 Genomes Consortium. 1,135 Genomes Reveal the Global Pattern of Polymorphism in Arabidopsis  
715 thaliana. *Cell* **166**, 481-491, doi:10.1016/j.cell.2016.05.063 (2016).

- 716 29 Wilson, J. L. *et al.* Inverse Data-Driven Modeling and Multiomics Analysis Reveals Phgdh as a Metabolic Checkpoint  
717 of Macrophage Polarization and Proliferation. *Cell Rep* **30**, 1542-1552 e1547, doi:10.1016/j.celrep.2020.01.011  
718 (2020).
- 719 30 Nägele, T. *et al.* Solving the differential biochemical jacobian from metabolomics covariance data. *PLoS ONE* **9**  
720 (2014).
- 721 31 Ferrero-serrano, Á. & Assmann, S. M. Phenotypic and genome-wide association of natural variation with the local  
722 environment of Arabidopsis. *Nature Ecology & Evolution* **3**, 1-41, doi:10.1038/s41559-018-0754-5 (2019).
- 723 32 Zhen, Y. & Ungerer, M. C. Clinal variation in freezing tolerance among natural accessions of Arabidopsis thaliana.  
724 *New Phytologist*, 1-9, doi:10.1111/j.1469-8137.2007.02262.x (2008).
- 725 33 Kang, J. *et al.* Natural variation of C-repeat-binding factor (CBFs) genes is a major cause of divergence in freezing  
726 tolerance among a group of Arabidopsis thaliana populations along the Yangtze River in China. *New Phytologist*  
727 **199**, 1069-1080, doi:10.1111/nph.12335 (2013).
- 728 34 Fournier-Level, A. *et al.* A map of local adaptation in Arabidopsis thaliana. *Science (New York, N.Y.)* **334**, 86–89,  
729 doi:10.1126/science.1209271 (2011).
- 730 35 Hancock, A. M. *et al.* Adaptation to climate across the Arabidopsis thaliana genome. *Science (New York, N.Y.)* **334**,  
731 83-86, doi:10.1126/science.1209244 (2011).
- 732 36 Florez-Sarasa, I. *et al.* Differences in Metabolic and Physiological Responses between Local and Widespread  
733 Grapevine Cultivars under Water Deficit Stress. *Agronomy* **10**, 1052 (2020).
- 734 37 Strand, A., Hurry, V., Gustafsson, P. & Gardestrom, P. Development of Arabidopsis thaliana leaves at low  
735 temperatures releases the suppression of photosynthesis and photosynthetic gene expression despite the  
736 accumulation of soluble carbohydrates. *Plant Journal* **12**, 605-614 (1997).
- 737 38 Meyer, R. C. *et al.* The metabolic signature related to high plant growth rate in *Arabidopsis thaliana*.  
738 *Proceedings of the National Academy of Sciences* **104**, 4759-4764, doi:10.1073/pnas.0609709104 (2007).
- 739 39 Vanholme, R., Demedts, B., Morreel, K., Ralph, J. & Boerjan, W. Lignin Biosynthesis and Structure. *Plant Physiology*  
740 **153**, 895-905, doi:10.1104/pp.110.155119 (2010).
- 741 40 Schulz, E., Tohge, T., Zuther, E., Fernie, A. R. & Hinch, D. K. Flavonoids are determinants of freezing tolerance and  
742 cold acclimation in Arabidopsis thaliana. *Scientific Reports* **6**, 34027, doi:ARTN 34027  
743 10.1038/srep34027 (2016).
- 744 41 Dyson, B. C. *et al.* FUM2, a Cytosolic Fumarase, Is Essential for Acclimation to Low Temperature in *Arabidopsis*  
745 *thaliana*. *Plant Physiology* **172**, 118-127, doi:10.1104/pp.16.00852 (2016).
- 746 42 Weizmann, J., Fürtauer, L., Weckwerth, W. & Nägele, T. Vacuolar invertase activity shapes photosynthetic stress  
747 response of Arabidopsis thaliana and stabilizes central energy supply. *bioRxiv* (2017).
- 748 43 Riewe, D. *et al.* A naturally occurring promoter polymorphism of the Arabidopsis FUM2 gene causes expression  
749 variation, and is associated with metabolic and growth traits. *Plant J* **88**, 826-838, doi:10.1111/tpj.13303 (2016).
- 750 44 Schulze, W. X., Schneider, T., Starck, S., Martinoia, E. & Trentmann, O. Cold acclimation induces changes in  
751 Arabidopsis tonoplast protein abundance and activity and alters phosphorylation of tonoplast monosaccharide  
752 transporters. *The Plant Journal* **69**, 529-541, doi:10.1111/j.1365-313X.2011.04812.x (2012).
- 753 45 Planchais, S. *et al.* BASIC AMINO ACID CARRIER 2 gene expression modulates arginine and urea content and stress  
754 recovery in Arabidopsis leaves. *Front Plant Sci* **5**, 330, doi:10.3389/fpls.2014.00330 (2014).
- 755 46 Witte, C. P. Urea metabolism in plants. *Plant Sci* **180**, 431-438, doi:10.1016/j.plantsci.2010.11.010 (2011).
- 756 47 Guy, C., Kaplan, F., Kopka, J., Selbig, J. & Hinch, D. K. Metabolomics of temperature stress. *Physiologia Plantarum*  
757 **132**, 220-235, doi:10.1111/j.1399-3054.2007.00999.x (2008).
- 758 48 Espinoza, C. *et al.* Interaction with Diurnal and Circadian Regulation Results in Dynamic Metabolic and  
759 Transcriptional Changes during Cold Acclimation in Arabidopsis. *PLoS ONE* **5**, e14101-e14101,  
760 doi:10.1371/journal.pone.0014101 (2010).
- 761 49 Less, H. & Galili, G. Principal transcriptional programs regulating plant amino acid metabolism in response to abiotic  
762 stresses. *Plant Physiol* **147**, 316-330, doi:10.1104/pp.108.115733 (2008).
- 763 50 Weizmann, J., Fürtauer, L., Weckwerth, W. & Nägele, T. Vacuolar sucrose cleavage prevents limitation of cytosolic  
764 carbohydrate metabolism and stabilizes photosynthesis under abiotic stress. *FEBS J* **285**, 4082-4098,  
765 doi:10.1111/febs.14656 (2018).
- 766 51 Geigenberger, P. & Stitt, M. A futile cycle of sucrose synthesis and degradation is involved regulating partitioning  
767 between sucrose starch and respiration in cotyledons of germinating ricinus-communis l. Seedlings when phloem  
768 transport is inhibited. *Planta* **185**, 81–90 (1991).
- 769 52 Ruan, Y.-L. Sucrose metabolism: gateway to diverse carbon use and sugar signaling. *Annual review of plant biology*,  
770 doi:10.1146/annurev-arplant-050213-040251 (2014).
- 771 53 Ben-izhak Monselise, E., Parola, A. H. & Kost, D. Low-frequency electromagnetic fields induce a stress effect upon  
772 higher plants, as evident by the universal stress signal, alanine. *Biochemical and Biophysical Research*  
773 *Communications* **302**, 427-434, doi:10.1016/s0006-291x(03)00194-3 (2003).
- 774 54 Zhang, Q. *et al.* Characterization of Arabidopsis serine:glyoxylate aminotransferase, AGT1, as an asparagine  
775 aminotransferase. *Phytochemistry* **85**, 30-35, doi:10.1016/j.phytochem.2012.09.017 (2013).
- 776 55 Betsche, T. Aminotransfer from Alanine and Glutamate to Glycine and Serine during Photorespiration in Oat  
777 Leaves. *Plant Physiology* **71**, 961-965, doi:10.1104/pp.71.4.961 (1983).



778 56 Obata, T. & Fernie, A. R. The use of metabolomics to dissect plant responses to abiotic stresses. *Cellular and*  
779 *Molecular Life Sciences* **69**, 3225-3243, doi:10.1007/s00018-012-1091-5 (2012).  
780 57 Maruyama, K. *et al.* Integrated Analysis of the Effects of Cold and Dehydration on Rice Metabolites,  
781 Phytohormones, and Gene Transcripts. *Plant Physiology* **164**, 1759-1771, doi:10.1104/pp.113.231720 (2014).  
782 58 Junker, A. *et al.* Optimizing experimental procedures for quantitative evaluation of crop plant performance in high  
783 throughput phenotyping systems. *Frontiers in Plant Science* **5**, doi:10.3389/fpls.2014.00770 (2015).  
784 59 Paine, C. E. T. *et al.* How to fit nonlinear plant growth models and calculate growth rates: an update for ecologists.  
785 *Methods in Ecology and Evolution* **3**, 245-256, doi:10.1111/j.2041-210X.2011.00155.x (2012).  
786 60 nlme: Linear and Nonlinear Mixed Effects Models (2020).  
787 61 Bürkner, P.-C. brms: An R Package for Bayesian Multilevel Models Using Stan. *2017* **80**, 28,  
788 doi:10.18637/jss.v080.i01 (2017).  
789 62 emmeans: Estimated Marginal Means, aka Least-Squares Means (2020).  
790 63 R: A Language and Environment for Statistical Computing (R Foundation for Statistical Computing, 2019).  
791 64 Wickham, H. *et al.* Welcome to the Tidyverse. *Journal of Open Source Software* **4**, 1686 (2019).  
792 65 Yuan, T., Masaaki, H. & Wenxuan, L. ggfortify: Unified Interface to Visualize Statistical Result of Popular R Packages.  
793 *The R Journal* **8** (2016).  
794 66 Houshyani, B. *et al.* Characterization of the natural variation in Arabidopsis thaliana metabolome by the analysis of  
795 metabolic distance. *Metabolomics* **8**, 131-145, doi:10.1007/s11306-011-0375-3 (2012).  
796 67 Hmisc: Harrell Miscellaneous (2020).  
797 68 Fick, S. E. & Hijmans, R. J. WorldClim 2: new 1-km spatial resolution climate surfaces for global land areas.  
798 *International Journal of Climatology* **37**, 4302-4315, doi:10.1002/joc.5086 (2017).  
799 69 caret: Classification and Regression Training (2019).  
800 70 leaps: Regression Subset Selection (2020).  
801 71 Friedman, J., Hastie, T. & Tibshirani, R. Regularization Paths for Generalized Linear Models via Coordinate Descent.  
802 *J Stat Softw* **33**, 1-22, doi:10.18637/jss.v033.i01 (2010).  
803 72 Oksanen, J. *et al.* Package 'vegan'. *Community ecology package, version 2*, 1-295 (2013).  
804 73 Nägele, T. Linking metabolomics data to underlying metabolic regulation. *Frontiers in Molecular Biosciences* **1**, 1-  
805 6, doi:10.3389/fmolb.2014.00022 (2014).  
806 74 Kim, S. *et al.* Recombination and linkage disequilibrium in Arabidopsis thaliana. *Nat Genet* **39**, 1151-1155,  
807 doi:10.1038/ng2115 (2007).  
808 75 Perlaza-Jiménez, L. & Walther, D. A genome-wide scan for correlated mutations detects macromolecular and  
809 chromatin interactions in Arabidopsis thaliana. *Nucleic Acids Research* **46**, 8114-8132, doi:10.1093/nar/gky576  
810 (2018).  
811 76 Lippert, C., Casale, F. P., Rakitsch, B. & Stegle, O. LIMIX: genetic analysis of multiple traits. *bioRxiv*, 003905,  
812 doi:10.1101/003905 (2014).

813

814

815 **SUPPLEMENTS:**

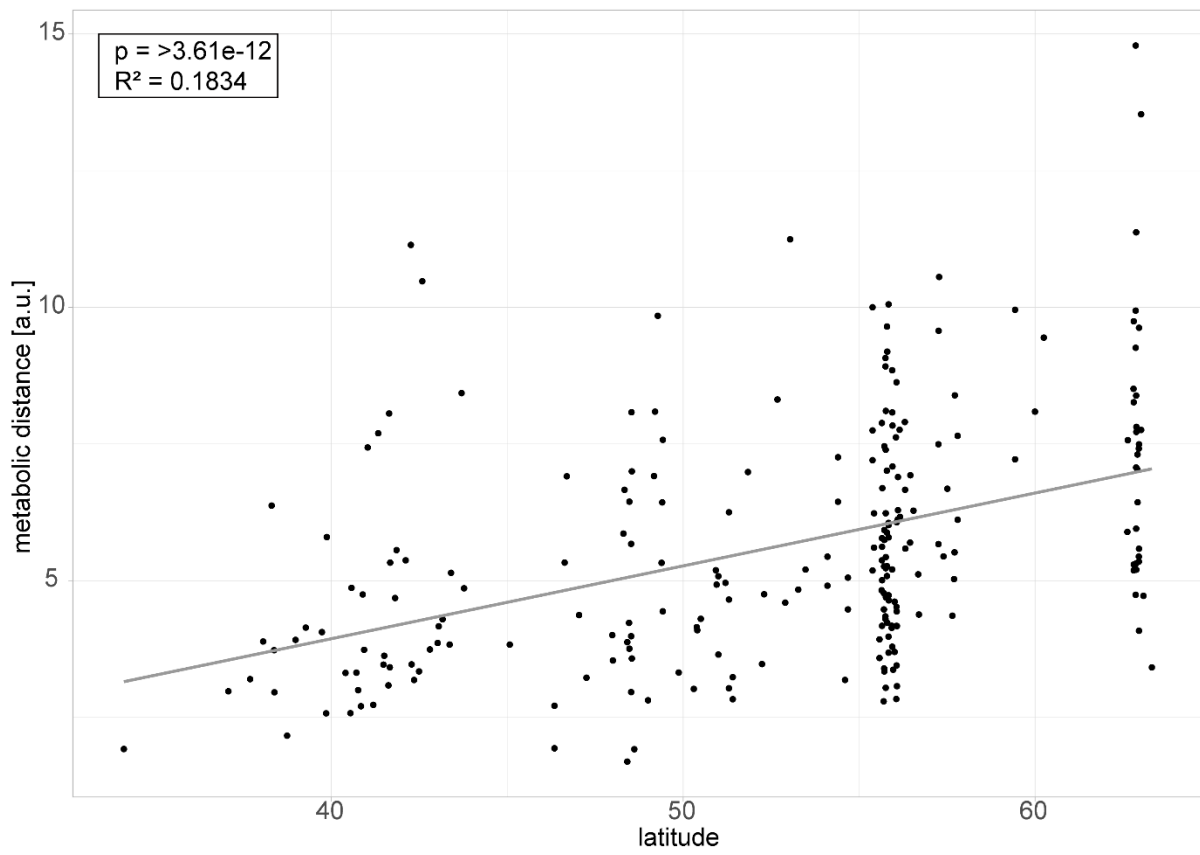

816

817 *Figure S 1 Relationship of metabolic distance and latitude of origin.*

818

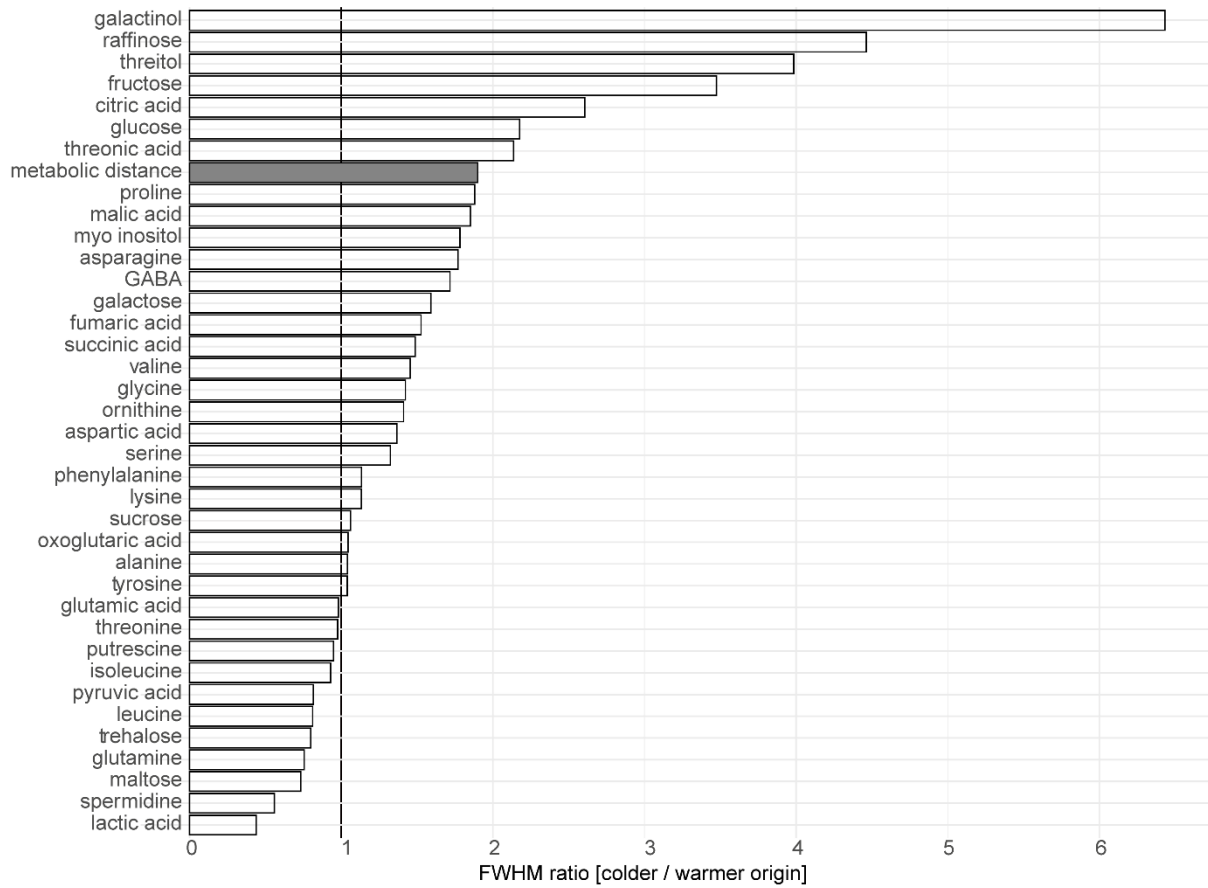

819

820

821

822

823

*Figure S 2 Ratios of Full Width at Half Maximum (FWHM) of kernel density functions of colder and warmer origin accessions. This ratio represents differences in variance between the groups of climatic origin. White bars – metabolites, grey bar – metabolic distance.*

824

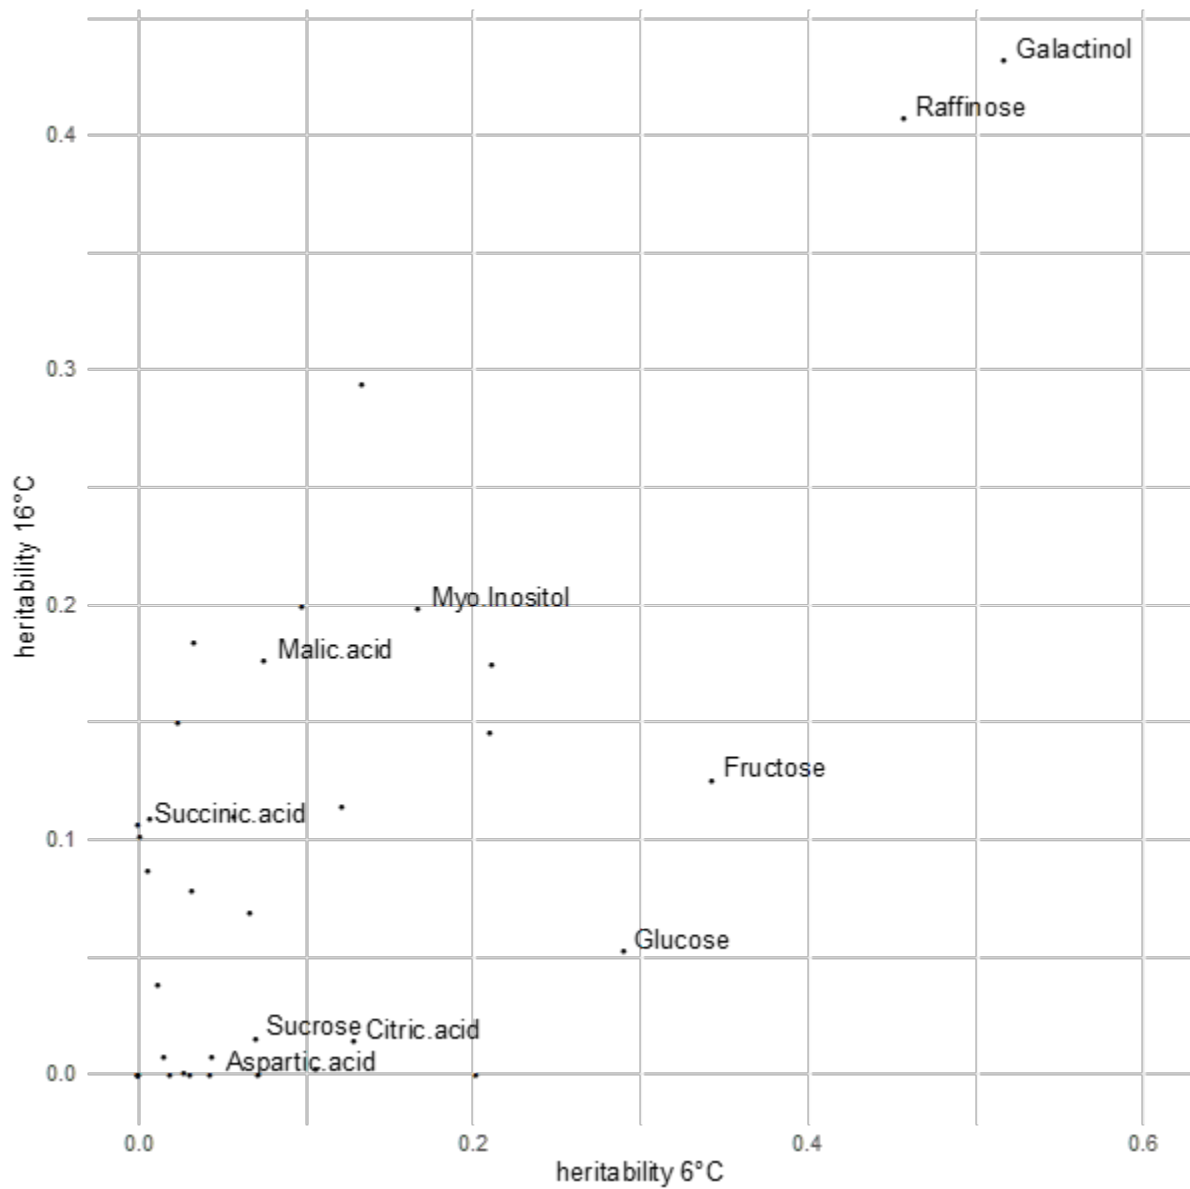

825

826

827

Figure S 3 Heritabilities of individual metabolites in 16 °C and 6 °C. Broad sense heritabilities for each metabolite in 6 °C and 16 °C. Indicated are the metabolites whose increased variance were responsible for increased variance in metabolic distance.

828

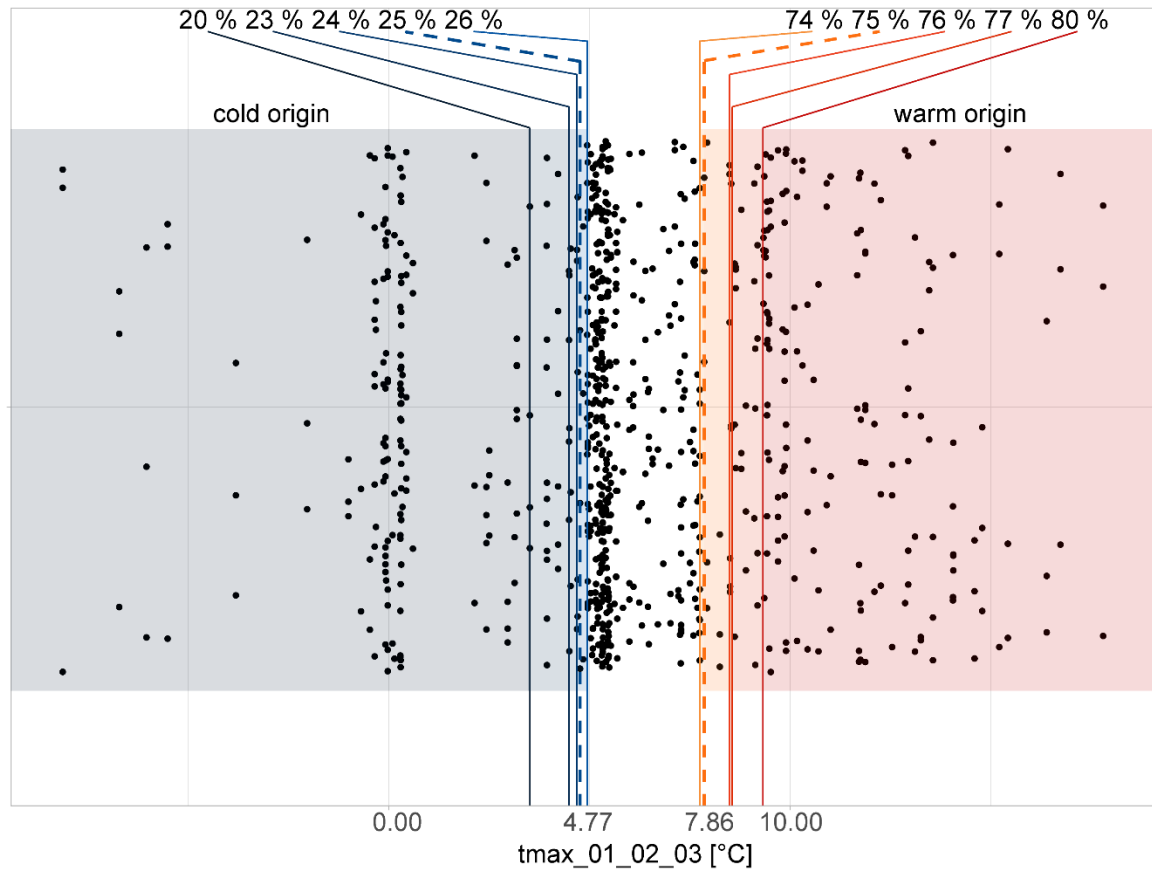

829

830 *Figure S 4 Accessions are ordered according to  $t_{max\_01\_02\_03}$  (maximum temperature in January, February and March).*  
831 *The lower 25 % and the upper 75 % of accessions were used as colder or warmer origin accessions respectively. For Jacobian*  
832 *modelling, additionally the lower 20, 23, 24 or 25 % and the upper 74, 76, 77 or 80 % of the dataset were used as variations*  
833 *of the threshold.*

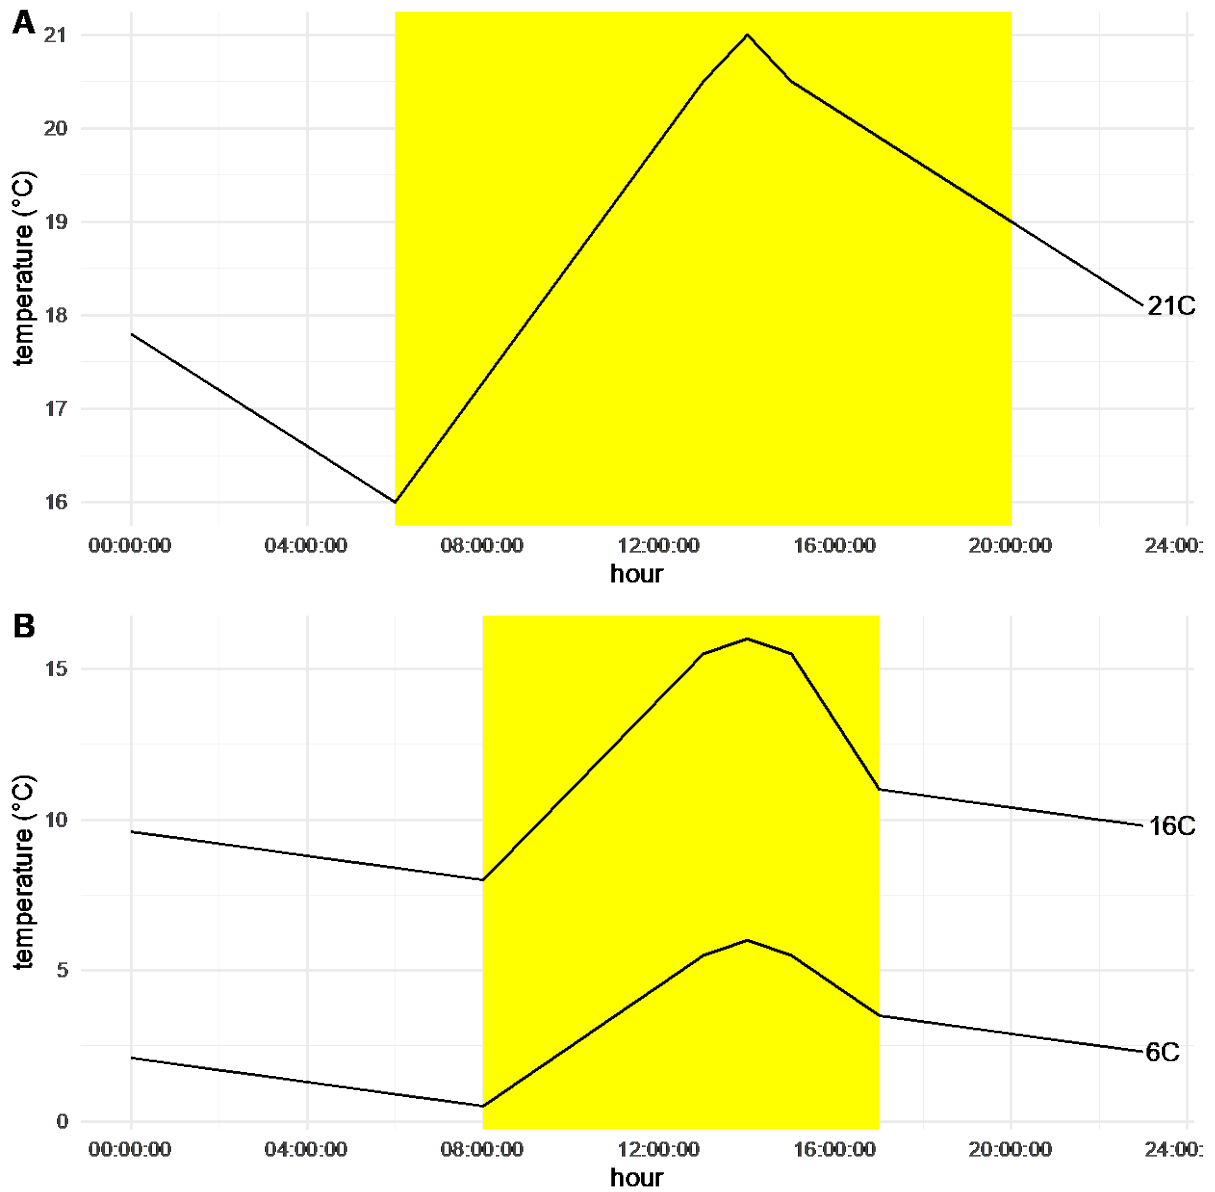

834

835

836

837

Figure 5 5 Temperature profiles of the different growth conditions. A - Temperature trajectory over 24 hours for the initial germination and growth condition with temperatures ranging from 16 to 21 °C. B - The temperature trajectory over 24 hours for the 16 °C and 6 °C growth conditions (indicated with labels 16C and 6C respectively. Yellow indicates when lights were on.
